# Supplementary material for: Prospective longitudinal study of tobacco company adaptation to standardised packaging in the UK: identifying circumventions and closing loopholes
Source: PubMed Central journal article supplement (PMC6773294; doi:10.1136/bmjopen-2018-028506), 2019-09-24
Supplement: bmjopen-2018-028506.draft_revisions.pdf [file bmjopen-2018-028506.draft_revisions.pdf]

# BMJ Open

BMJ Open is committed to open peer review. As part of this commitment we make the peer review history of every article we publish publicly available.

When an article is published we post the peer reviewers' comments and the authors' responses online. We also post the versions of the paper that were used during peer review. These are the versions that the peer review comments apply to.

The versions of the paper that follow are the versions that were submitted during the peer review process. They are not the versions of record or the final published versions. They should not be cited or distributed as the published version of this manuscript.

BMJ Open is an open access journal and the full, final, typeset and author-corrected version of record of the manuscript is available on our site with no access controls, subscription charges or pay-per-view fees (<http://bmjopen.bmj.com>).

If you have any questions on BMJ Open's open peer review process please email [info.bmjopen@bmj.com](mailto:info.bmjopen@bmj.com)

# BMJ Open

## Assessing tobacco company adaptation to standardised packaging: identifying circumventions and closing loopholes

|                                                                                                                                                                |                                                                                                                                                                                                                                                                                                                                                                                                                                                                                                                                                                      |
|----------------------------------------------------------------------------------------------------------------------------------------------------------------|----------------------------------------------------------------------------------------------------------------------------------------------------------------------------------------------------------------------------------------------------------------------------------------------------------------------------------------------------------------------------------------------------------------------------------------------------------------------------------------------------------------------------------------------------------------------|
| Journal:                                                                                                                                                       | <i>BMJ Open</i>                                                                                                                                                                                                                                                                                                                                                                                                                                                                                                                                                      |
| Manuscript ID                                                                                                                                                  | bmjopen-2018-028506                                                                                                                                                                                                                                                                                                                                                                                                                                                                                                                                                  |
| Article Type:                                                                                                                                                  | Research                                                                                                                                                                                                                                                                                                                                                                                                                                                                                                                                                             |
| Date Submitted by the Author:                                                                                                                                  | 17-Dec-2018                                                                                                                                                                                                                                                                                                                                                                                                                                                                                                                                                          |
| Complete List of Authors:                                                                                                                                      | Evans-Reeves, Karen; University of Bath, Tobacco Control Research Group, UK Centre for Tobacco and Alcohol Studies, Department for Health<br>Hiscock, Rosemary; University of Bath, Tobacco Control Research Group, UK Centre for Tobacco and Alcohol Studies, Department for Health<br>Lauber, Kathrin; University of Bath, Tobacco Control Research Group, UK Centre for Tobacco and Alcohol Studies, Department for Health<br>Gilmore, Anna; Tobacco Control Research Group, UK Centre for Tobacco and Alcohol Studies, Department for Health, University of Bath |
| Keywords:                                                                                                                                                      | PUBLIC HEALTH, PREVENTIVE MEDICINE, TOBACCO, STANDARDISED PACKAGING                                                                                                                                                                                                                                                                                                                                                                                                                                                                                                  |
| <p>Note: The following files were submitted by the author for peer review, but cannot be converted to PDF. You must view these files (e.g. movies) online.</p> |                                                                                                                                                                                                                                                                                                                                                                                                                                                                                                                                                                      |
| Video 1.MP4                                                                                                                                                    |                                                                                                                                                                                                                                                                                                                                                                                                                                                                                                                                                                      |

SCHOLARONE™  
Manuscripts

# Assessing tobacco company adaptation to standardised packaging: identifying circumventions and closing loopholes

Karen A Evans-Reeves<sup>1</sup>, email [K.A.Evans-Reeves@bath.ac.uk](mailto:K.A.Evans-Reeves@bath.ac.uk)

Rosemary Hiscock<sup>1\*</sup>, email [R.Hiscock@bath.ac.uk](mailto:R.Hiscock@bath.ac.uk)

Kathrin Lauber<sup>1</sup>, email [K.Lauber@bath.ac.uk](mailto:K.Lauber@bath.ac.uk)

Anna B Gilmore<sup>1</sup>, email [A.Gilmore@bath.ac.uk](mailto:A.Gilmore@bath.ac.uk)

<sup>1</sup>Tobacco Control Research Group, University of Bath and UK Centre of Tobacco and Alcohol Studies, Bath, UK

\*Corresponding author: +44 (0)1225 388388

**Key words:** tobacco, tobacco industry, standardised packaging, plain packs

**Word count:** 4251

## Abstract

**Objectives:** UK standardised packaging legislation was introduced alongside pack size and product descriptor restrictions of the European Union Tobacco Products Directive to end tobacco marketing and misinformation via the pack. This paper aims to assess compliance with the restrictions and identify attempts to continue to market tobacco products and perpetuate misperceptions of harm post-legislation.

**Design, setting and intervention:** A prospective study of the introduction of standardised packaging of tobacco products to the UK.

**Participants and outcomes:** We analysed Nielsen sales data to assess whether the legally required changes in pack branding, size and name were implemented by the deadline. To explore any adaptations to products and packaging we analysed data from monthly pack purchases of factory-made and roll-your-own cigarettes, tobacco adverts from retail trade magazines and articles on tobacco from commercial literature (e.g. trade, market analyst and tobacco company publications).

**Results:** While compliance was good (99% by November 2017), tobacco companies used the one-year sell-through to their advantage by communicating brand name changes and providing financial incentives for retailers to buy large volumes of branded packs. They made adaptations to tobacco products to enable continued marketing and brand differentiation. For example, companies included colours (either to convey the historical colour of the pack or a characteristic) arguably enabling continued misperceptions about the relative harms of products. In addition, innovations to exemptions of the legislation, namely filters, packaging edges, seals, multipack outers, RYO accessories, cigars and pipe tobacco were all marketed to retailers.

1  
2  
3 **Conclusions:** Tobacco companies adapted to packaging restrictions by innovating their  
4  
5 marketing activities. These findings should enable policy makers globally to close loopholes.  
6  
7  
8  
9  
10  
11  
12  
13  
14  
15  
16  
17  
18  
19  
20  
21  
22  
23  
24  
25  
26  
27  
28  
29  
30  
31  
32  
33  
34  
35  
36  
37  
38  
39  
40  
41  
42  
43  
44  
45  
46  
47  
48  
49  
50  
51  
52  
53  
54  
55  
56  
57  
58  
59  
60

For peer review only

# Article Summary

## Strengths and limitations of the study

- The strength of this paper lies both in the detail and depth of each analysis including our systematic analysis of retail press adverts (n=195) and commercial literature articles and reports (n= 396) alongside pack purchases of the top selling brands and detailed sales information from Nielsen.
- Using multiple data sources has, in many instances, enabled findings to be verified by more than one source and enabled a greater understanding of the tobacco industry's motives for any changes made to their products and packaging.
- Resources prevented us from acquiring Nielsen data on cigars or pipe tobacco and from purchasing more than one brand per price segment in the pack purchasing study element but we were able to compensate, to some extent, by using information available from other sources.
- We assumed that 30g RYO packs were always in standardised packs and that larger packs would switch to standardised packs at the same time; the temporal patterns of switching names and sizes are similar to FM (where standardised packaging was indicated) and it is therefore reasonable to assume that branding was removed at the same time.
- Although, we do not know the extent to which Nielsen variant name changes lag behind and even reflect those printed on packs in retailers, the main name change patterns found in the Nielsen data were similar to those found in a UK convenience store study and an evaluation of the introduction of standardised packaging in Australia.

1  
2  
3  
4  
5  
6  
7 **Funding:** This work was supported by Cancer Research UK grant number C27260/A23168.

8  
9 The authors are members of the UK Centre for Tobacco & Alcohol Studies, a UK Clinical  
10  
11 Research Collaboration Public Health Research Centre of Excellence whose work is  
12  
13 supported by funding from the Medical Research Council, British Heart Foundation, Cancer  
14  
15 Research UK, Economic and Social Research Council, and the National Institute for Health  
16  
17 Research under the auspices of the UK Clinical Research Collaboration (MR/K023195/1).  
18  
19

20  
21  
22  
23  
24  
25 **Competing Interests:** The authors have no competing interests.  
26  
27  
28  
29  
30  
31  
32  
33  
34  
35  
36  
37  
38  
39  
40  
41  
42  
43  
44  
45  
46  
47  
48  
49  
50  
51  
52  
53  
54  
55  
56  
57  
58  
59  
60

## Background

Standardised tobacco packaging, one of the most significant policy threats to the tobacco industry in recent years, came into force in the UK on May 20<sup>th</sup> 2016. From this date all new factory made (FM) cigarettes and roll your own (RYO) tobacco, manufactured or imported for UK consumption were to be sold in standardised packaging. Tobacco companies were given until May 20<sup>th</sup> 2017 to comply with the law; a period referred to as the 'sell-through'. During this time, companies were not permitted to print any new branded packets(1, 2). The UK legislation(1) was implemented in concert with the revision of the 2001 European Union (EU) Tobacco Products Directive (TPD)(3) which placed further restrictions on packaging and naming of brands (Box 1)(3).

After Australia became the first country to introduce standardised packaging in December 2012, tobacco companies responded with more evocative and descriptive tobacco product names, including colours to represent the previous pack colour, thereby continuing the connotations associated with these colours(4, 5) . Simultaneously companies reduced the total number of brands sold and renewed their focus on value for money brands by increasing the number and length of cigarettes in a pack and introducing menthol variants in this price range.(6)

While the UK and EU legislation combined closed some of loopholes in the Australian legislation, by prohibiting evocative names and requiring minimum pack sizes for both cigarettes and RYO,(7) concerns remain. The current legislation does not permits the use of colour descriptors, bevelled edges on packs and cigarette filter technology innovations.

Furthermore, cigars, cigarillos and pipe tobacco are exempt from the legislation and are still



1  
2  
3 sold in branded packaging, while wholesaler multipacks are still allowed branded 'outer'  
4  
5 wraps.  
6  
7

8  
9 Recently published research suggests that, prior to the full implementation of standardised  
10 packaging in the UK, tobacco companies added smaller pack sizes such as 17 sticks to their  
11 brand variant portfolios,(8) introduced colour descriptors to brand variant names and made  
12 product changes, particularly to filters.(9) Examples of name change patterns associated  
13 with UK standardised packaging restrictions have been described qualitatively(7, 9, 10) but  
14 not quantitatively. The scale of these name changes and if/how these changes were  
15 communicated to the public is not clear from published research. Previous work has also  
16 only explored up to two months post-legislation.  
17  
18  
19  
20  
21  
22  
23  
24  
25  
26  
27

28 Therefore, the purpose of this paper was to use mixed methods to combine data from four  
29 different data sources up to 7 months post full-implementation to systematically and  
30 rigorously examine how compliant tobacco companies were with the legislation, and to  
31 explore any attempts they made to circumvent. We assess how their marketing has adapted  
32 including, changes to products or packaging that would endure after the legislation was fully  
33 implemented, and whether and how products are being marketed to retailers and  
34 consumers. The findings of this paper have global significance as they can help close  
35 loopholes during the design and implementation of standardised packaging legislation in  
36 other jurisdictions.  
37  
38  
39  
40  
41  
42  
43  
44  
45  
46  
47  
48  
49

50  
51 BOX 1. Summary of restrictions UK Standardised packaging legislation and the European  
52 Union Tobacco Products Directive Revision (implemented 20 May 2016 – 20 May 2017)

53  
54  
55  
56 **UK STANDARDISED PACKAGING**

**EU TOBACCO PRODUCTS DIRECTIVE**  
57  
58  
59  
60

|                                                                                                                                                                                           |                                                                                                                                                                                                                                                                                                                                                                     |
|-------------------------------------------------------------------------------------------------------------------------------------------------------------------------------------------|---------------------------------------------------------------------------------------------------------------------------------------------------------------------------------------------------------------------------------------------------------------------------------------------------------------------------------------------------------------------|
| <p>PACK EXTERNAL COLOUR: External packaging of cigarettes or RYO tobacco is Pantone 448C (matt finish)</p>                                                                                | <p>PACKAGING OPENING: A unit packet of cigarettes may consist of carton or soft material and shall not have an opening that can be reclosed or re-sealed after it is first opened, other than the flip-top lid and shoulder box with a hinged lid. For packets with a flip-top lid and hinged lid, the lid shall be hinged only at the back of the unit packet.</p> |
| <p>PACK INTERNAL COLOUR: Internal colour of cigarette or RYO packaging must be white or Pantone 448C (matt finish)</p>                                                                    | <p>PACK SIZE: Cigarette packs must contain a minimum of 20 cigarettes &amp; RYO tobacco must contain at least 30 grams of tobacco</p>                                                                                                                                                                                                                               |
| <p>NOISE AND SMELL: Packaging must not make a noise or produce a smell that is not normally associated with the packaging</p>                                                             | <p>IMPRESSION CREATION: There must be no packaging elements that create an erroneous impression about the characteristics, health effects, risks or emissions of tobacco</p>                                                                                                                                                                                        |
| <p>PACKAGING EVOLUTION: The packaging must not change after retail sale, for example, heat activated inks, embellishments designed to appear gradually over time, scratch panels etc.</p> | <p>TOBACCO INGREDIENTS: No description of nicotine, tar or carbon monoxide content of a tobacco product</p>                                                                                                                                                                                                                                                         |

1  
2  
3  
4 PACKAGING SHAPE: Cigarette packets  
5  
6 must be made of carton or soft material and  
7  
8 be cuboid in shape & RYO may be in a  
9  
10 cuboid box, a cylinder or a pouch  
11  
12 (bevelled or rounded edges are permitted)  
13  
14  
15  
16  
17

FLAVOUR: No reference to taste, smell or  
any flavourings or additives or the absence  
of any such thing

18 STICK DESIGN: Cigarette stick paper must  
19  
20 be plain white (matt finish), the filter must  
21  
22 only be coloured in such a way as to imitate  
23  
24 cork. The stick may have the brand name  
25  
26 and variant printed in black Helvetica type  
27  
28 no larger than 8 point in normal weighted  
29  
30 regular typeface not more than 38 mm from  
31  
32 the filter end of the cigarette. The start of  
33  
34 each word can be an upper case letter but  
35  
36 the rest of the word must be lower-case  
37  
38  
39  
40  
41  
42  
43

ENVIRONMENT: No suggestion that a  
particular tobacco product has improved  
biodegradability or other environmental  
advantages

44 RESEMBLANCE: No resemblance to a  
45  
46 food or cosmetic product  
47  
48  
49  
50

PROMOTION: No suggestion of economic  
advantage of one product over another – no  
price marked packs

## Methods

### Data Sources

We utilised four data sources, 1) purchases of eight top-selling tobacco brands; 2) tobacco adverts in retail trade publications; 3) other commercial literature: retail press articles and advertorials, tobacco company annual reports and Euromonitor market analyst reports; and 4) Nielsen data. While compliance with the legislation was primarily assessed using the Nielsen data, the evidence collected from each data source was utilised to assess whether, and how, tobacco companies adapted to the legislation and continued to market their products. We triangulated data from these different datasets not only to verify the existence of adaptations but also, their purpose.

### ***Pack Purchasing and observation***

We conducted monthly pack purchases between March 2016 and May 2017 to assess visual and sensory changes over time in the leading FM and RYO products (Table 1) at price points previously identified.(8)

Additionally, we observed price lists of cigar and pipe tobacco brands available in-store and the appearance of 'outers' (the cover wrap used to bind multiple packs together for distribution) where visible.

Table 1. Pack purchases of the top selling brand in each price segment

| Price segment<br>(average price<br>per pack/stick)<br><sup>1</sup> [ref Nielsen<br>paper] | Top selling products                                                     |                                                                   | Co<br>4            |
|-------------------------------------------------------------------------------------------|--------------------------------------------------------------------------|-------------------------------------------------------------------|--------------------|
|                                                                                           | March 2016 name & pack size                                              | May 2017 equivalent name & pack size                              |                    |
| FM                                                                                        |                                                                          |                                                                   |                    |
| Premium<br>(£6.76/£0.42)                                                                  | Marlboro Gold (20s)                                                      | Marlboro Gold (20s)                                               | PM<br>I            |
| Midprice <sup>2</sup><br>(£5.61/£0.36)                                                    | L&B Original Lambert & Butler Silver<br>(20s)<br>Mayfair King Size (19s) | Lambert & Butler Original Silver (20s)<br>Mayfair King Size (20s) | IM<br>T<br>JTI     |
| Value<br>(£5.10/£0.33)                                                                    | L&B Blue Lambert & Butler Real Blue<br>(19s)                             | L&B Blue Real Blue(20s)                                           | IM<br>T            |
| Subvalue<br>(£4.68/£0.29)                                                                 | Carlton Red (19s)<br>Rothmans of London <sup>3</sup> (17s)               | Carlton Red (20s)<br>Rothmans Blue (20s)                          | IM<br>T<br>BA<br>T |
| RYO <sup>5</sup>                                                                          |                                                                          |                                                                   |                    |
| Premium<br>(£6.97/£0.17)                                                                  | Golden Virginia The Original (25g)                                       | Golden Virginia The Original (30g)                                | IM<br>T            |
| Midprice<br>(£5.81/£0.15)                                                                 | Amber Leaf (25g)                                                         | Amber Leaf Original (30g)                                         | JTI                |

<sup>1</sup> weighted average price per pack/stick of all products sold within tobacco industry price segments as described by previous analysis (Dec 2015 prices – inflation adjusted to 2008 values). One RYO stick was estimated to be 0.5g tobacco.(8, 11)

<sup>2</sup>Midprice was originally two major segments: Lambert & Butler was the leading upper midprice product and Mayfair the leading lower midprice product

<sup>3</sup>None of the top selling brands in each price range was owned by British American Tobacco. For completeness we added Rothman's of London (a subvalue brand) - the top selling brand for British American Tobacco.

<sup>4</sup>Tobacco company' abbreviations: BAT British American Tobacco, IMT Imperial Tobacco, JTI Japan Tobacco International, PMI Philip Morris International

<sup>5</sup> No RYO value segment (average pack/stick price: £4.28/£0.14) product was purchased due to lower sales volumes even of the leading brand (Gold Leaf) in this segment.

### **Advertisements in the retail press**

We searched hard copies of retail and wholesale publications *The Grocer*, *Wholesale News* and *Retail Newsagent* between January 2015 and December 2017 for all tobacco adverts.

We coded 195 adverts for the attributes marketed to retailers, eg, new brand variant, packaging, filter, limited edition, price, retailer profit. We examined the distribution of these marketing themes by price segment (Table S1). We separately assessed advertorials for relevance to standardised packaging and noted the main messages communicated.

### **Commercial literature review**

We searched online retail publications (*The Grocer*, *Wholesale News*, *betterretailing.com* (which includes *Retail Newsagent* and *Retail Express*, *talkingretail.com*), to identify articles relevant to tobacco packaging and marketing (Jan 2015 – Dec 2017; Table 2). We also included two reviews of 2017 published in 2018, Euromonitor reports on tobacco, and tobacco company annual reports covering this period. We used NVivo 10, to code articles for any evidence of circumvention of the legislation and used quotes taken from the commercial literature as examples of each circumvention (Table S2).

1  
2  
3  
4  
5  
6  
7  
8  
9  
10  
11  
12  
13  
14  
15  
16  
17  
18  
19  
20  
21  
22  
23  
24  
25  
26  
27  
28  
29  
30  
31  
32  
33  
34  
35  
36  
37  
38  
39  
40  
41  
42  
43  
44  
45  
46  
47  
48  
49  
50  
51  
52  
53  
54  
55  
56  
57  
58  
59  
60

For peer review only

Table 2 Commercial literature review January 2015 to December 2017

| <i>Source</i>                                                             | <i>Search terms (depends on search procedure of website)</i>                                    | <i>Total available</i> | <i>Total examined</i> |
|---------------------------------------------------------------------------|-------------------------------------------------------------------------------------------------|------------------------|-----------------------|
| <b>RETAILER MAGAZINES</b>                                                 |                                                                                                 |                        |                       |
| <b>Convenience &amp; independents</b>                                     |                                                                                                 |                        |                       |
| Betterretailing.com:<br>Retail Newsagent<br>Retail Express                | "tobacco"                                                                                       | 350                    | 181                   |
| TalkingRetail.com                                                         | "tobacco"                                                                                       | 50                     | 49                    |
|                                                                           |                                                                                                 |                        |                       |
| <b>Wholesalers &amp; FMCG</b>                                             |                                                                                                 |                        |                       |
| Wholesale News                                                            | "tobacco" or "cigarette" or "ryo" or "roll+your+own" or "hand+rolled" or "cigar" or "cigarillo" | 54                     | 30                    |
| The Grocer                                                                | "tobacco" or "cigarette" or "ryo" or "roll+your+own" or "hand+rolled" or "cigar" or "cigarillo" | 820                    | 104                   |
|                                                                           |                                                                                                 |                        |                       |
| <b>INDUSTRY ANALYST</b>                                                   |                                                                                                 |                        |                       |
| Euromonitor Passport                                                      | "tobacco"                                                                                       | NA                     | 20                    |
|                                                                           |                                                                                                 |                        |                       |
| <b>TOBACCO COMPANY</b>                                                    |                                                                                                 |                        |                       |
| Annual reports from the big four tobacco companies: JTI, IMT, BAT and PMI | Annual reports                                                                                  | 12                     | 12                    |
| <b>TOTAL</b>                                                              |                                                                                                 | 1286                   | 396                   |

**Nielsen Data**



1  
2  
3 Nielsen collates data on tobacco sales from nearly 90% of UK supermarkets and a stratified  
4  
5 sample of 15% of convenience stores. (8) Using a hierarchical structure Nielsen records for  
6  
7 each product, the tobacco brand, brand family, brand variant and then specific features of  
8  
9 the pack denoted by a unique serial number known as a SKU (e.g. size, pricemarked) (8). In  
10  
11 November 2017 there were 71 brands, 97 families, 241 variants, and 1022 SKUs (Table 3).  
12  
13  
14  
15  
16  
17  
18  
19  
20  
21  
22  
23  
24  
25  
26  
27  
28  
29  
30  
31  
32  
33  
34  
35  
36  
37  
38  
39  
40  
41  
42  
43  
44  
45  
46  
47  
48  
49  
50  
51  
52  
53  
54  
55  
56  
57  
58  
59  
60

For peer review only

Table 3 Hierarchical brand architecture available in the Nielsen data

| Hierarchy of Nielsen data                                                                                                                                                                                | Example                                                             | N (UK market) |          |
|----------------------------------------------------------------------------------------------------------------------------------------------------------------------------------------------------------|---------------------------------------------------------------------|---------------|----------|
|                                                                                                                                                                                                          |                                                                     | July 2014     | Nov 2017 |
| BRAND                                                                                                                                                                                                    | Marlboro                                                            | 44            | 71       |
| BRAND FAMILY<br>Products with the same brand name but sold at different price points                                                                                                                     | Marlboro <u>Bright Leaf</u>                                         | 114           | 97       |
| BRAND VARIANT<br>Product at same price point but with different length (e.g. superkings, kingsize), flavour or other characteristics                                                                     | Marlboro Bright Leaf <u>Platinum</u>                                | 282           | 241      |
| Stock Keeping Unit (SKU) Each individual barcoded product including specific pack characteristics: pack size, whether the pack is price-marked, and, for FM but not RYO, whether standardised or branded | Marlboro Bright Leaf Platinum <u>10s multipack not price marked</u> | 930           | 1022     |

## Data Analysis

### *Compliance*

1  
2  
3 Nielsen sales data were used to examine compliance with the removal of branding,  
4  
5  
6 pricemarking and small pack sizes (Box 1), between July 2016 (when the first standardised  
7  
8 packs first were sold(10) and November 2017. For FM, Nielsen identifies which packs are  
9  
10 standardised and which branded. For RYO it does not. However, as 30g packs of RYO were  
11  
12 negligible prior to standardised pack legislation RYO packs of 30g or more were treated as  
13  
14 standardised.  
15  
16

### 17 ***Name changes***

18  
19 We identified the number, names and price segments of all brand variants whose name  
20  
21 changed between July 2014 and November 2017. We coded and counted whether each  
22  
23 name change was required for compliance with the legislation and recorded the type of  
24  
25 name change eg colour added or adjective added.  
26  
27  
28  
29  
30  
31  
32  
33  
34  
35  
36  
37  
38  
39  
40  
41  
42  
43  
44  
45  
46  
47  
48  
49  
50  
51  
52  
53  
54  
55  
56  
57  
58  
59  
60

### ***Innovation targeting***

To understand whether innovations were targeted at particular price segments, we compared the distribution of name changes and new variants in November 2017 with the distribution of price segments prior to the decision to implement legislation in July 2014. Differences in the number of variants were tested using chi-square tests and Fishers exact tests (when the expected number of cases was less than 5). To achieve sufficient numbers for analysis, price segments were merged into four categories: (1) FM premium and midprice, (2) FM value and subvalue, (3) RYO premium and midprice, (4) RYO value.

### ***Patient and Public Involvement***

KER and RH led a focus group with smokers and former smokers from the UKCTAS University of Nottingham Smokers Panel (now known as the Tobacco & Nicotine Discussion Group) in October 2017. The group were asked to discuss their thoughts on and experiences of the move to standardised packs.

## **Results**

Four main strategies were identified from multiple data sources. We present the evidence for each in turn.

### **Strategy 1: Keep branded packets on the market as long as possible**

Six months into the year-long sell-through period, 96% of FM and 82% RYO were still sold in branded packs (Figure 1 & table S3). Most FM (70%) and RYO (65%) packs switched to

1  
2  
3 standardised packs between January and April 2017. One month after full-implementation,  
4  
5 1% FM and 2% RYO were sold in non-compliant packs, declining to 1% FM and negligible  
6  
7 RYO by November 2017.  
8  
9

10  
11  
12  
13  
14  
15 The commercial literature suggests that tobacco companies produced greater volumes of  
16  
17 their branded FM and RYO tobacco prior to the May 2016 manufacturing deadline to keep  
18  
19 branded packaging on the market for as long as possible during the sell-through.(12)  
20  
21

22  
23 Tobacco companies offered cash incentives and promotions on branded packs to retailers to  
24  
25 encourage sales and loyalty to their products. By early 2017 this was described as a price-  
26  
27 war between the manufacturers (13, 14) . To allay retailers' concerns about being left with  
28  
29 non-compliant stock after the deadline, tobacco companies offered to buy them back (Table  
30  
31 S2; Strategy 1.3).(15)  
32  
33  
34  
35  
36

### 37 **Strategy 2: Maintaining brand variant differentiation through name changes**

38  
39 A third (35%; 123/ 353) of variants changed name between July 2014 and November 2017.  
40  
41  
42 Of those, less than half changed name to comply with legislation (42%, n=52/123) and most  
43  
44 of these removed flavour names as the legislation required but substituted with other names,  
45  
46 most often a colour (Table 4). Most notably, FM smooth became bright or sky blue, with  
47  
48 RYO smooth changing to yellow and menthol for both FM and RYO changing to green.  
49  
50

51  
52 Of the variants which changed name when it was not necessary for legislative compliance  
53  
54 (N=71/123, 58%), colours were introduced for the first time as a substitute for the previous  
55  
56 pack colour, eg. *Marlboro* with the red chevron on the pack became Marlboro Red. Similarly,  
57  
58 to distinguish brand variants from one another and to continue previous brand variant  
59  
60

1  
2  
3 identities, other adjectives were added to brand names, most notably adjectives  
4  
5 accompanied a colour, e.g. *real* blue, *bright* silver, *legendary* black. In addition, during the  
6  
7 study period, 23 new variants appeared in the Nielsen dataset with names which included  
8  
9 elements that went beyond the purpose of practical information: 'signature', 'ome', 'silver  
10  
11 strand' in May 2015, 'Eagle,' and 'Colours'" in November 2015 and 'Chill' in May 2016 and  
12  
13 two different brands added 'Black Russian' variants in November 2015 and January 2017.  
14  
15 Lastly two new Golden Virginia RYO variants appeared on the market in November 2015  
16  
17 named 'Midnight' and 'Sunrise'. Commercial literature revealed that these indicated rich and  
18  
19 smooth flavours respectively. (16). The first brand variant in a brand family sometimes had  
20  
21 'original' added e.g. Amber Leaf RYO became Amber Leaf original.  
22  
23  
24  
25  
26  
27  
28  
29  
30  
31  
32  
33  
34  
35  
36  
37  
38  
39  
40  
41  
42  
43  
44  
45  
46  
47  
48  
49  
50  
51  
52  
53  
54  
55  
56  
57  
58  
59  
60

Table 4. FM and RYO brand variant name changes (July 2014 to November 2017)

|                                                                             | N                  | Additions/substitutions                     |
|-----------------------------------------------------------------------------|--------------------|---------------------------------------------|
| <b>Legally required actions</b>                                             |                    |                                             |
| <i>Taste removed</i>                                                        |                    | <i>Replacement</i>                          |
| Menthol                                                                     | Colour             | 20 green                                    |
|                                                                             | No replacement     | 2                                           |
| Smooth                                                                      | Colour + adjective | 12 bright blue/yellow, sky blue             |
|                                                                             | Adjective          | 5 bright, sky                               |
|                                                                             | Colour             | 3 blue, yellow                              |
|                                                                             | Other Substitution | 1 fine                                      |
| other taste ('fresh burst', 'fresh taste', 'ice capsule', 'subtle flavour') | Other Substitution | 3 crushball, dual                           |
|                                                                             | No replacement     | 1                                           |
| <i>Environmental advantages removed</i>                                     |                    |                                             |
| 'Natural'                                                                   | Other Substitution | 2 blue, king size                           |
|                                                                             | No replacement     | 3                                           |
| Total                                                                       |                    | 52                                          |
| <b>Discretionary actions only</b>                                           |                    |                                             |
| colour+adjective added                                                      |                    | 9 original silver/blue/black, real blue/red |
| adjective added                                                             |                    | 8 bright, real, legendary                   |
| colour added                                                                |                    | 7 blue, red, black                          |
| 'original' added                                                            |                    | 6                                           |
| size (king size, superkings) removed                                        |                    | 6                                           |
| Mixed & miscellaneous                                                       |                    | 35                                          |

|                    |           |
|--------------------|-----------|
| Total              | 71        |
| <b>Grand total</b> | <b>12</b> |
|                    | <b>3</b>  |

In October 2016, five months into the sell-through period and before IMT had made any of its legally required name changes to its products, the company outlined its brand renaming strategy in an advertorial in the retail press.<sup>(17)</sup> The advertorial explained that all products traditionally presented as full flavour would become 'real' or 'original' and be associated primarily with the colour red. Those previously denoted as 'smooth' would change to 'bright' and become associated with the colour blue. Menthol would become green and capsule would become Crushball (Table S2: Strategy 2). IMT also provided retailers with materials to help explain changes to consumers.<sup>(17)</sup> Some companies also advertised name changes directly to consumers through pack inserts (eg. BAT's Rothmans of London included a pack insert to warn its smokers that it was to become Rothman's Blue).

### **Strategy 3. Focus on lower price segments**

During the study period, 68% of new variants recorded by Nielsen were FM and 32% RYO. Given that in July 2014, 81% variants on the UK market were FM and 19% were RYO (Table 5), more new RYO variants were introduced than expected ( $p=.018$ ).

Half (50%) of all new variants were introduced in the FM value and subvalue price segments, 22% FM premium and midprice, 15% RYO premium and midprice and 13% RYO value. However, prior to the decision to implement standardised packaging (July 2014), the distribution of the market was 50% FM premium and midprice, 35% FM value and subvalue,



1  
2  
3 8% RYO premium and midprice and 7% RYO value. Thus new variants were under-  
4 represented among FM premium and midprice brands ( $p=.001$ ).  
5  
6  
7  
8  
9

10 Similarly, compared with July 2014, name changes in the study period were overrepresented  
11 among FM value and subvalue ( $p=.048$ ) and under-represented among FM premium and  
12 midprice brands ( $p=.002$ ).  
13  
14  
15  
16  
17  
18  
19  
20  
21  
22  
23  
24  
25  
26  
27  
28  
29  
30  
31  
32  
33  
34  
35  
36  
37  
38  
39  
40  
41  
42  
43  
44  
45  
46  
47  
48  
49  
50  
51  
52  
53  
54  
55  
56  
57  
58  
59  
60

For peer review only

Table 5 Comparison of distribution of variants prior to the decision to enact legislation (July 2014), variants with name changes and new variants that entered the market.

|                        | Baseline distribution of variants (July 2014) |     | Name changes (July 2014 – November) |     |      | New variants (November 2018) |     |      |
|------------------------|-----------------------------------------------|-----|-------------------------------------|-----|------|------------------------------|-----|------|
|                        | N                                             | %   | N                                   | %   | P*   | N                            | %   | P*   |
|                        | <b>Tobacco Type</b>                           |     |                                     |     |      |                              |     |      |
| FM                     | 225                                           | 81% | 12                                  | 79% | .527 | 48                           | 68% | .018 |
| RYO                    | 54                                            | 19% | 35                                  | 21% |      | 23                           | 32% |      |
| <b>Price segment</b>   |                                               |     |                                     |     |      |                              |     |      |
| FM premium & midprice  | 103                                           | 50% | 48                                  | 33% | .002 | 10                           | 22% | .001 |
| FM value & sub value   | 72                                            | 35% | 66                                  | 45% | .048 | 23                           | 50% | .054 |
| RYO premium & midprice |                                               |     |                                     |     | .097 |                              |     | .164 |
|                        | 17                                            | 8%  | 20                                  | 14% |      | 7                            | 15% | #    |
| RYO value              |                                               |     |                                     |     | .735 |                              |     | .602 |
|                        | 15                                            | 7%  | 12                                  | 8%  |      | 6                            | 13% | #    |

\*Chi square comparing with July 2014 distribution

#Fishers exact test comparing with July 2014 distribution

Nearly two-thirds of the adverts captured from the retail press, 124/195 (64%) advertised value or subvalue brands. Similarly, for new products, the majority of adverts (30/38; 79%) were for value or subvalue brands. Only one advert was a new premium offering.

The commercial literature found tobacco companies innovating within lower price segments, introducing packs with fewer cigarettes prior to the sell-through (18-20) followed by a price-war in the lower priced segments with some manufacturers reportedly selling at a loss to gain market share.(13) By the end of 2017 tobacco companies stated that smokers expected better quality products in lower price segments after standardised packaging and Minimum Excise Tax (MET) legislation raised the price of the cheaper brands and so 'premium features' in lower priced cigarettes appeared (Table S2: Strategy 3).(19, 21) For example, a

1  
2  
3 redesign to Chesterfield (subvalue) was advertised to retailers in December 2017, citing a  
4  
5  
6 new 'firm' filter and, as with premium brand Marlboro, a new bevelled edge box.(20, 22)  
7  
8  
9  
10  
11  
12  
13  
14  
15  
16  
17  
18  
19  
20  
21  
22  
23  
24  
25  
26  
27  
28  
29  
30  
31  
32  
33  
34  
35  
36  
37  
38  
39  
40  
41  
42  
43  
44  
45  
46  
47  
48  
49  
50  
51  
52  
53  
54  
55  
56  
57  
58  
59  
60

For peer review only

#### **Strategy 4. Innovating exemptions to the legislation**

The commercial literature and pack purchase study suggested that tobacco companies continued to innovate and market their tobacco products by focusing on exemptions to the legislation (Table S2: Strategy 4).

##### ***Pack modifications that endured post-legislation***

During the sell-through, the pack purchase and commercial literature review revealed that FM Marlboro 10s and RYO *Amber Leaf*, *Golden Virginia* and *Cutter's Choice* were sold in reusable tins, arguably allowing consumers to decant cigarettes bought post-legislation into branded tins. Selling RYO in tins is not novel but cigarettes have rarely been sold in tins previously.

Pack purchases found that best-selling premium brand family *Marlboro* changed significantly in July 2016 (two months into sell-through), with the introduction of bevelled pack edges and a *pro-seal* closing mechanism (Figure 2). Both features fundamentally changed the tactile nature of the pack which endured after full-implementation in May 2017 (Video 1). To be compliant with the legislation, these packs must have been printed prior to May 2016.

##### ***Extra Sticks***

Given that there is no restriction on the maximum number of sticks per pack, packs with more than 20 continued post-legislation. Following full-implementation sales of packs with 23 and 24 sticks increased from 7 to 11 million packs.

##### ***Branded Outers***

The retail literature and in person observations revealed that multipack wholesale outers are

1  
2  
3 branded (Figure 3). Outers can be seen by customers during tobacco product gantry  
4  
5 restocking. Adverts in the retail press showed images of branded tobacco products including  
6  
7 branded outers post-legislation.  
8  
9

### 12 ***RYO accessories***

13  
14 Increased innovation was observed among RYO accessories post legislation with retail  
15  
16 press articles in November 2017 and February 2018 referring to “‘ultra slim’ and slim filters  
17  
18 and papers, biodegradable filters, and menthol tips” (Table S2; Strategy 4.4). (21, 23)  
19  
20

### 21 ***Cigars***

22  
23 Cigars, which can be sold in branded packs, single sticks without pictorial health warnings,  
24  
25 at a relatively low price and with good profit margin, were identified as an opportunity for  
26  
27 growth.(20, 24-27) Euromonitor’s models suggested growth in cigars and cigarillos sales  
28  
29 volumes (390 to 494 million units) and value (£292 to £348 million) from 2015 to 18 (Table  
30  
31 S4). Towards the end of 2017, JTI and cigar company Ritmeester were holding social events  
32  
33 to build relationships with retailers (Table S2; Strategy 4.5). (20)  
34  
35  
36  
37

### 38 ***Pipe Tobacco***

39  
40 The retail literature revealed that one small tobacco manufacturer, *Gawith Hoggarth*,  
41  
42 deliberately marketed pipe tobacco as RYO to circumvent the minimum pack size  
43  
44 restrictions on RYO (Table S2; Strategy 4.6).(28)  
45  
46  
47  
48

## 49 **Discussion**

50  
51 UK Standardised Packaging legislation and the EU TPD placed restrictions on tobacco  
52  
53 packaging and marketing in the UK. Overall, compliance with the restrictions (removal of  
54  
55 branding, small pack sizes and non-compliant names) was good. However, clarity is needed  
56  
57 about the legality of isolated incidents such as the compliance of the *Marlboro* resealable  
58  
59  
60

1  
2  
3 pack and Gawith Hoggath's marketing of its *Kendal* pipe tobacco as RYO. Technical  
4  
5 compliance aside, this paper identified four key strategies of tobacco companies which have  
6  
7 arguably enabled them to continue marketing tobacco post-legislation.  
8  
9

10  
11 Firstly, the retail literature suggests that tobacco companies used the 12-month sell-through  
12  
13 to their advantage, keeping branded stock on the market as long as possible, and using the  
14  
15 time to communicate name changes to retailers and customers. Ahead of the sell-through  
16  
17 companies increased production of branded packs, introduced smaller pack sizes to enable  
18  
19 more affordable offerings, and encouraged retailers to buy large quantities of branded stock  
20  
21 at reduced prices. Other countries had a shorter sell through period with three-months for  
22  
23 Australia and New Zealand (29, 30) and seven months for France (31). Other countries  
24  
25 considering the legislation should resist calls for a lengthy sell-through.  
26  
27  
28  
29  
30  
31  
32

33 Second, although compliant with legally required name removals, tobacco companies  
34  
35 implemented a standard name change formula that maintained the brand identity and  
36  
37 differentiation of the three broad flavour categories (1) full flavour; (2) smooth; (3)  
38  
39 menthol.(17) In 2002 terms such as 'mild' and 'light' were prohibited to curb misperceptions  
40  
41 of relative harm. However, the continuation of the colours of the previous packs such as the  
42  
43 gold and white pack for *Marlboro 'lights'* and the introduction of terms such as smooth for  
44  
45 other brands sustained these misperceptions.(32, 33) In line with the power of colour in  
46  
47 brand identity, this study shows that tobacco companies changed '*full-flavour*' variants to  
48  
49 *red, original, or real; menthol* variants to *green*, and *smooth* variants to *bright* and *blue* (or  
50  
51 *yellow* for RYO). As in 2002, the current restrictions on tobacco product name were  
52  
53 designed disrupt misperceptions of relative harms based on flavour descriptions but yet  
54  
55 again, tobacco companies have adapted to ensure that such misperceptions are likely to  
56  
57  
58  
59  
60

1  
2  
3 endure. Therefore there is a case to be made to follow the example of Uruguay where only  
4  
5 one brand variant is permitted per brand and no new brands are allowed.  
6  
7

8  
9 Third, Nielsen data and the commercial literature revealed that tobacco companies were  
10  
11 fighting fervently for market share in the cheaper price segments with a price war pre-  
12  
13 implementation, more adverts, name changes, extra sticks in packs and new brand variants  
14  
15 introduced in lower price segments over the study period. This taken in concert with our  
16  
17 fourth finding that tobacco companies are targeting tobacco products, features and  
18  
19 accessories not covered by the UK or EU legislation for innovation and growth provides a  
20  
21 case for expanding the legislation to include: standardised packaging for cigars, cigarillos,  
22  
23 pipe tobacco, wholesale outer wraps, standardised pack edges, maximum pack sizes and  
24  
25 prohibitions for innovations to filters, pack seals RYO papers.  
26  
27  
28  
29

30  
31 The strength of this paper lies both in the detail and depth of each analysis including our  
32  
33 systematic analysis of retail press adverts (n=195) and commercial literature articles and  
34  
35 reports (n= 396) alongside pack purchases of the top selling brands and detailed sales  
36  
37 information from Nielsen. Using multiple data sources has, in many instances, enabled  
38  
39 findings to be verified by more than one source and enabled a greater understanding of the  
40  
41 tobacco industry's motives for any changes made to their products and packaging.  
42  
43

44  
45 Nevertheless, despite evidence from an IMT whistleblower(34) and PMI's own words(35) our  
46  
47 data did not reveal price mark stickers on tobacco products, this is likely to be because we  
48  
49 bought our eight brands from a large supermarket and not a convenience store and because  
50  
51 this industry strategy was not highlighted in the retail literature due to the questionable  
52  
53 legality of this strategy.(36)  
54  
55  
56  
57  
58  
59  
60

1  
2  
3 Resources prevented us from acquiring Nielsen data on cigars or pipe tobacco and from  
4  
5 purchasing more than one brand per price segment in the pack purchasing study element.  
6  
7

8 However, the retail literature alerted us that cigars and other products will be targeted as  
9  
10 growth opportunities and, although not able to fully capture the sensory nature of brands, our  
11  
12 analysis of the adverts ensured that we would see many, if not all, innovations being  
13  
14 promoted to retailers.  
15  
16

17  
18 Nielsen data does not record whether RYO products are sold in standardised packs. We  
19  
20 assumed that 30g packs were always in standardised packs and that larger packs would  
21  
22 switch to standardised packs at the same time. It is possible that this did not occur.  
23  
24

25 However the temporal patterns of switching names and sizes are similar for FM and RYO  
26  
27 and it is therefore reasonable to assume that branding was removed at the same time.  
28  
29

30 Nielsen model prices and volumes for the UK based on a census of the major supermarket  
31  
32 sales and a rolling sample of convenience stores. Although, we do not know the extent to  
33  
34 which Nielsen variant name changes lag behind and even reflect those printed on packs in  
35  
36 retailers, the main name change patterns found in the Nielsen data were similar to those  
37  
38 found in a UK convenience store study(37) and an evaluation of the introduction of  
39  
40 standardised packaging in Australia.  
41  
42  
43  
44

45 Given that the tobacco industry is attempting to circumvent standardised packaging  
46  
47 legislation, it is incumbent on other countries considering the policy to make regulations as  
48  
49 comprehensive as possible to prevent the exploitation of continued marketing opportunities.  
50  
51

52 In summary, this paper suggests that long sell-through periods should be avoided and that  
53  
54 restricting tobacco products to one brand variant per brand and an extending regulations to  
55  
56 include other tobacco products, features and accessories should be considered.  
57  
58  
59  
60



1  
2  
3  
4  
5  
6  
7  
8  
9  
10  
11  
12  
13  
14  
15  
16  
17  
18  
19  
20  
21  
22  
23  
24  
25  
26  
27  
28  
29  
30  
31  
32  
33  
34  
35  
36  
37  
38  
39  
40  
41  
42  
43  
44  
45  
46  
47  
48  
49  
50  
51  
52  
53  
54  
55  
56  
57  
58  
59  
60

For peer review only

1  
2  
3 **Author contributions:** AG designed the study with contributions from KER and RH. KER led  
4 the writing of the paper and designed, conducted and analysed the pack purchase element  
5 of the study. RH analysed the Nielsen data in addition to downloading and analysing the  
6 commercial literature. KL collated the retail literature adverts, involving visits to the British  
7 Library and analysed the data. All authors read and approved the manuscript. The authors  
8 would like to thank Dr Rob Branston who read and commented upon a near final draft and  
9 Ilhan Marsal who helped with early preparation of the adverts and pack purchased data.  
10  
11  
12  
13  
14  
15  
16  
17  
18  
19  
20

21 **Data statement:** Where suitable data sets have deposited in the University of Bath data  
22 archive.  
23  
24  
25  
26  
27  
28  
29  
30  
31  
32  
33  
34  
35  
36  
37  
38  
39  
40  
41  
42  
43  
44  
45  
46  
47  
48  
49  
50  
51  
52  
53  
54  
55  
56  
57  
58  
59  
60

## References

1. legislation.gov.uk. The standardised packaging of tobacco products regulations. In: UK Government, editor. 829; 2015.
2. Department of Health. Tobacco packaging guidance, guidance for retailers, manufacturers and distributors of tobacco products, enforcement agencies and the public on changes to tobacco packaging from 20 may 2016. Guidance; 2016.
3. Official Journal of the European Union. Directive 2014/40/eu of the european parliament and of the council of 3 april 2014. In: European Union, editor.; 2014.
4. Scollo M, Occlleston J, Bayly M, Lindorff K, Wakefield M. Tobacco product developments coinciding with the implementation of plain packaging in australia. Tobacco Control. 2014 April 30, 2014.
5. Scollo M, Bayly M, White S, Lindorff K, Wakefield M. Tobacco product developments in the australian market in the 4 years following plain packaging. Tobacco Control. 2017.
6. Scollo M, Zacher M, Coomber K, Bayly M, Wakefield M. Changes in use of types of tobacco products by pack sizes and price segments, prices paid and consumption following the introduction of plain packaging in australia. Tobacco Control. 2015 April 1, 2015;24(Suppl 2):ii66-ii75.
7. Moodie C, Hoek J, Scheffels J, Gallopel-Morvan K, Lindorff K. Plain packaging: Legislative differences in australia, france, the uk, new zealand and norway, and options for strengthening regulations. Tob Control. 2018 Aug 1.
8. Hiscock R, Branston JR, McNeill A, Hitchman SC, Partos TR, Gilmore AB. Tobacco industry strategies undermine government tax policy: Evidence from commercial data. Tobacco Control. 2017;27:488-97.
9. Moodie C, Angus K, Mitchell D, Critchlow N. How tobacco companies in the uk prepared for and responded to standardised packaging of cigarettes and rolling tobacco. Tobacco Control 2018.
10. Breton MO, Britton J, Huang Y, Bogdanovica I. Cigarette brand diversity and price changes during the implementation of plain packaging in the united kingdom. Addiction. 2018.
11. Branston JR, McNeill A, Gilmore AB, Hiscock R, Partos TR. Keeping smoking affordable in higher tax environments via smoking thinner roll-your-own cigarettes: Findings from the international tobacco control four country survey 2006–15. Drug and Alcohol Dependence. 2018;193:110-16.
12. Retail Newsagent. Explained: Retailer's questions about eutpd ii. Retail Newsagent; 10 May 2016.
13. BetterRetailing.com. Value brands price war hits retail profits. Retail Express 17 February 2017 [cited; Available from: <https://www.betterretailing.com/value-brands-price-war-hits-retail-profits>]
14. Retail Newsagent. Cash incentives and price cuts drive tobacco sales. Retail Newsagent; 26 May 2016.
15. Samrai G. Wholesalers: Tobacco suppliers will help retailers with branded stock post-eutpd ii. Retail Newsagent; 2 March 2017.
16. Imperial tobacco unveils gv midnight and sunrise. Talking Retail; 17 July 2015.
17. Imperial Tobacco. Partnering for success through eutpd ii and standardised packaging: Part 4. New pack descriptors under eutpd ii. Retail Newsagent. 28 October 2016:20-21.
18. O'Donnell T. The fat lady sings: Tobacco category report 2016. The Grocer; 11 February 2016.
19. Selwood D. Pall mall cigarettes get taste plus filter in range upgrade. The Grocer; 18 April 2016.
20. Yau A. The latest developments from the biggest tobacco brands. Retail Newsagent; 5 April 2018.
21. Pendleton R. A tightening stranglehold: Tobacco category report 2018. The Grocer; 9 February 2018.

- 1
- 2
- 3
- 4 22. Philip Morris International. Stock up now: Chesterfield with new premium features. Retail
- 5 Newsagent. 15 December 2017.
- 6 23. Cronin E. Rizla launches new natura paper and tips range. Talking Retail; 3 August 2017.
- 7 24. Appleby S. New tobacco law, means new opportunity for cigars sales. Retail Express; 6 June
- 8 2016.
- 9 25. Dillon C. Three things you can learn from ritmeester's cigar seminars. Retail Express; 17
- 10 September 2017.
- 11 26. Dillon C. Ritmeester launches single stick panatellas. Retail Express; 15 January 2015.
- 12 27. Lee J. Know the value of the tobacco market to keep sales strong. Retail Express; 22 August
- 13 2017.
- 14 28. Gockelen-Kozlowski T. Tobacco firms adapt to deal with latest eutpd laws. Retail
- 15 Newsagent; 25 May 2017.
- 16 29. Ministry of Health (New Zealand). Tobacco standardised packaging. 2017 13th June 2017
- 17 [cited; Available from: [https://www.health.govt.nz/our-work/preventative-health-wellness/tobacco-](https://www.health.govt.nz/our-work/preventative-health-wellness/tobacco-control/plain-packaging)
- 18 [control/plain-packaging](https://www.health.govt.nz/our-work/preventative-health-wellness/tobacco-control/plain-packaging)
- 19 30. Scollo M, Lindorff K, Coomber K, Bayly M, Wakefield M. Standardised packaging and new
- 20 enlarged graphic health warnings for tobacco products in australia—legislative requirements and
- 21 implementation of the &lt;em>&gt;tobacco plain packaging act 2011&lt;/em> and the
- 22 &lt;em>&gt;competition and consumer (tobacco) information standard&lt;/em>;,
- 23 &lt;em>&gt;2011&lt;/em>. Tobacco Control. 2015;24(Suppl 2):ii9.
- 24 31. Tobacco Labelling Resource Centre. France. 2013 [cited; Available from:
- 25 <http://www.tobaccolabels.ca/countries/france/>
- 26 32. Mutti S, Hammond D, Borland R, Cummings MK, O'Connor RJ, Fong GT. Beyond light and
- 27 mild: Cigarette brand descriptors and perceptions of risk in the international tobacco control (itc)
- 28 four country survey. Addiction. 2011;106(6):1166-1175.
- 29 33. Bansal-Travers M, O'Connor RJ, Fix BV, Cummings MK. What do cigarette pack colors
- 30 communicate to smokers in the u.S.? American Journal of Preventive Medicine. 2011;40(6):683-89.
- 31 34. Doward J. How tobacco firms flout uk law on plain packaging. 9 April 2017 [cited 12
- 32 November 2018]; Available from: [https://www.theguardian.com/society/2017/apr/09/tobacco-](https://www.theguardian.com/society/2017/apr/09/tobacco-companies-flout-law-plain-packaging)
- 33 [companies-flout-law-plain-packaging](https://www.theguardian.com/society/2017/apr/09/tobacco-companies-flout-law-plain-packaging)
- 34 35. Nixon P. Re: Price marking on packs. Letter from Peter Nixon, Philip Morris International to
- 35 Deborah Arnett, Action for Smoking and Health ed; 15 May 2017.
- 36 36. Leigh Day. Re: Price marking on tobacco packaging. Legal opinion of Leigh Day to Action for
- 37 Smoking and Health ed; 3 March 2017.
- 38 37. Critchlow N, Stead M, Moodie C, Eadie D, MacKintosh AM. Introduction of standardized
- 39 tobacco packaging during a 12-month tranistion period: Findings from small retailers in the united
- 40 kingdom. Nicotine & Tobacco research. 2018.
- 41 38. Yau A. Premium features sell cigarettes. Retail Newsagent; 4 December 2017.
- 42 39. Euromonitor. Passport: Philip morris intenrational inc in tobacco (world). July 2017.
- 43 40. Cronin E. Imperial tobacco unveils new innovations for 2018. Talking Retail; 24 November
- 44 2017.
- 45 41. Marlboro launches ducati promotion. Talking Retail; 31 July 2015.
- 46 42. Whitlock K. Imperial tobacco launches jps triple flow. Wholesale News. November 2015.
- 47
- 48
- 49
- 50
- 51
- 52
- 53
- 54
- 55
- 56
- 57
- 58
- 59
- 60

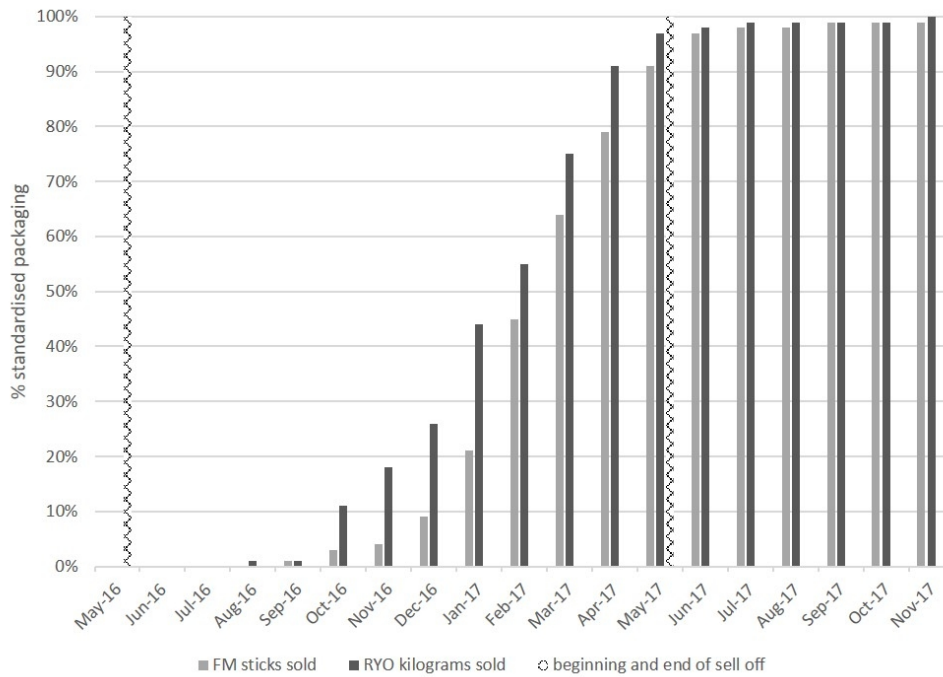

Figure 2. Proportion of (a) FM sticks and (b) RYO\* (by weight) sold in standardised packaging over time  
85x60mm (300 x 300 DPI)

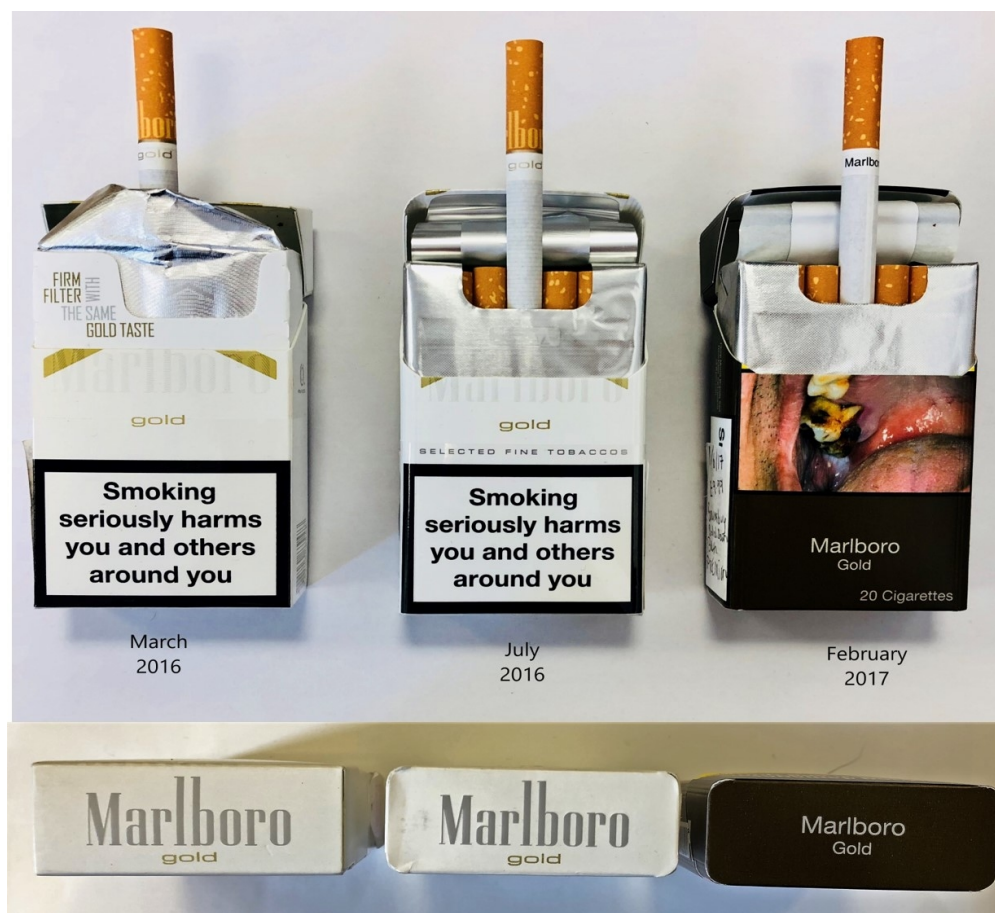

Figure 3. The evolution of Marlboro Gold packaging from a straight edge pack to a branded bevelled edge pack with a new internal packet with pro-seal sealing mechanism, to standardised packaging maintaining these innovations

103x94mm (300 x 300 DPI)

1  
2  
3  
4  
5  
6  
7  
8  
9  
10  
11  
12  
13  
14  
15  
16  
17  
18  
19  
20  
21  
22  
23  
24  
25  
26  
27  
28  
29  
30  
31  
32  
33  
34  
35  
36  
37  
38  
39  
40  
41  
42  
43  
44  
45  
46  
47  
48  
49  
50  
51  
52  
53  
54  
55  
56  
57  
58  
59  
60

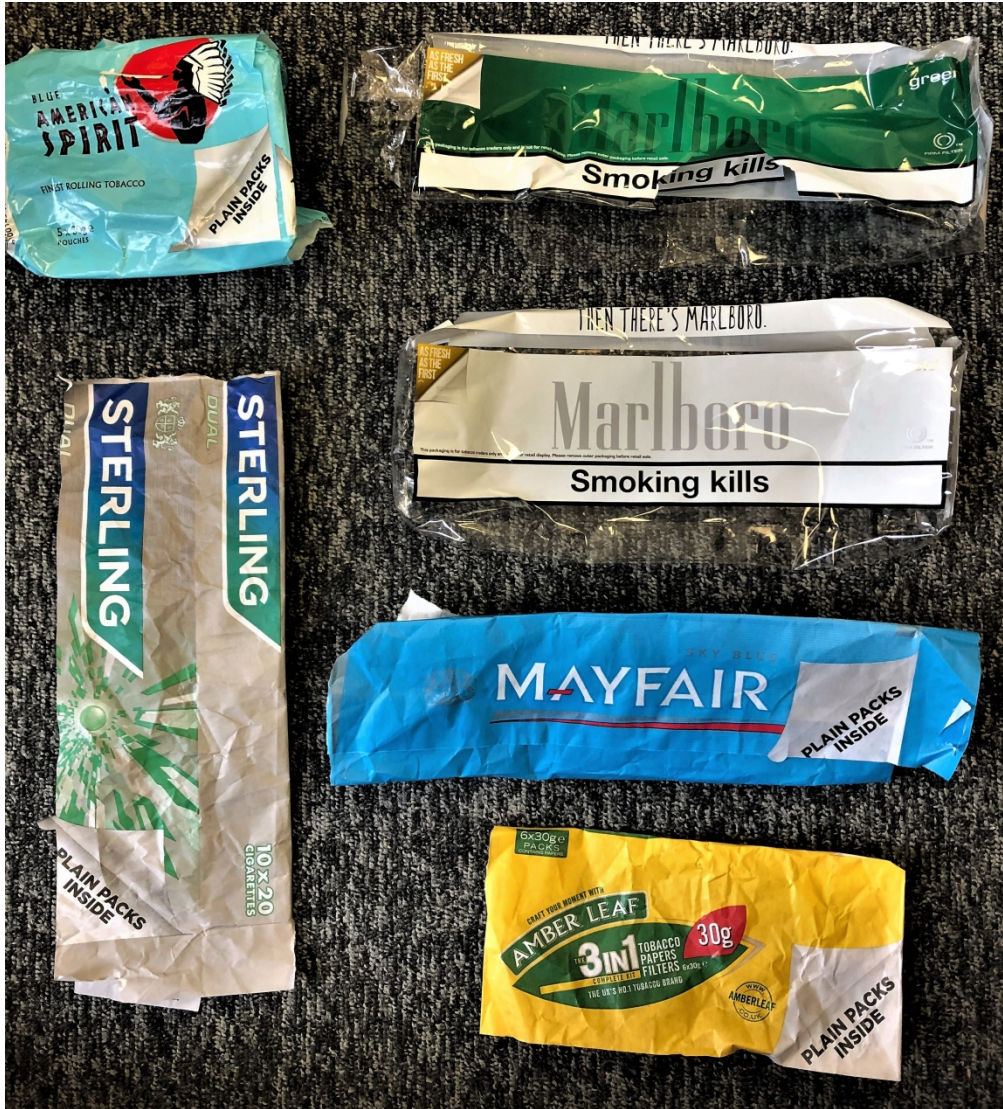

Figure 4. Branded outers post May 2016 (full-implementation)

256x283mm (300 x 300 DPI)

Supplementary file material for “Assessing tobacco company adaptation to standardised packaging: identifying circumventions and closing loopholes”

Table S1. Tobacco advert characteristics by price segment (n= 195) <sup>1</sup>

| Characteristics of advert <sup>2</sup> | Subvalue <sup>3</sup> | Value | Midprice | Premium |
|----------------------------------------|-----------------------|-------|----------|---------|
| <u>Type of tobacco</u>                 |                       |       |          |         |
| FM                                     | 22                    | 78    | 42       | 21      |
| RYO                                    | n/a                   | 24    | 13       | 16      |
| <u>Characteristics promoted</u>        |                       |       |          |         |
| New brand variant <sup>4</sup>         | 7                     | 23    | 5        | 1       |
| New packaging                          | 4                     | 25    | 17       | 16      |
| Limited Edition                        | 0                     | 4     | 5        | 5       |
| Filter                                 | 0                     | 16    | 0        | 6       |
| Price                                  | 19                    | 68    | 14       | 4       |
| Retailer profit                        | 1                     | 42    | 21       | 5       |

<sup>1</sup> Totals do not add up to 195 adverts as many adverts promoted more than one type of tobacco, more than one price segment and more than one characteristic in the same advert.

<sup>2</sup> Does not include pipe tobacco or cigars/cigarillos as we have no data on price segment for these products.

<sup>3</sup> FM only. This price segment does not exist for RYO.

<sup>4</sup> There were 38 adverts in total for a new brand variant yet 2 of the adverts could not be categorised by price segment.

| <u>Characteristics promoted</u> | <u>Cigars/ cigarillos</u> | <u>Pipe</u> |
|---------------------------------|---------------------------|-------------|
| New brand variant               | 0                         | 0           |
| New packaging                   | 0                         | 0           |
| Limited Edition                 | 2                         | 0           |
| Filter                          | 0                         | 0           |
| Price                           | 2                         | 1           |
| Retailer profit                 | 6                         | 1           |



Table S2 Industry strategies to circumvent standardised packaging and exploit loopholes implied by commercial literature

| Industry strategy                                                      | Tactic                                                                                | Quote from the commercial literature                                                                                                                                                                                                                                                                                                                                                                                                                                                                                                                                                                                                                                                                                                                                                                                                                                                                                                                                                                                                                                                                                                                                                                                                                                                                                                                                                                                                                                                                                                                                                                                                                                                                                                                                                                                                                                                |
|------------------------------------------------------------------------|---------------------------------------------------------------------------------------|-------------------------------------------------------------------------------------------------------------------------------------------------------------------------------------------------------------------------------------------------------------------------------------------------------------------------------------------------------------------------------------------------------------------------------------------------------------------------------------------------------------------------------------------------------------------------------------------------------------------------------------------------------------------------------------------------------------------------------------------------------------------------------------------------------------------------------------------------------------------------------------------------------------------------------------------------------------------------------------------------------------------------------------------------------------------------------------------------------------------------------------------------------------------------------------------------------------------------------------------------------------------------------------------------------------------------------------------------------------------------------------------------------------------------------------------------------------------------------------------------------------------------------------------------------------------------------------------------------------------------------------------------------------------------------------------------------------------------------------------------------------------------------------------------------------------------------------------------------------------------------------|
| 1. Keep branded packaging on the market throughout the sell-off period | 1.1 Over-producing branded packs before the sell-off                                  | “BAT has had to produce higher stocks prior to the 20 May 2016 manufacturing deadline in order to avoid out of stocks [branded]...The TPD explicitly provides for transitional provisions to allow product manufactured before 20 May 2016 to be sold until 20 May 2017.” Ron Ridderbeek, head of legal and external affairs at British American Tobacco [ <i>Retail Newsagent</i> , 10 May 2016]                                                                                                                                                                                                                                                                                                                                                                                                                                                                                                                                                                                                                                                                                                                                                                                                                                                                                                                                                                                                                                                                                                                                                                                                                                                                                                                                                                                                                                                                                   |
|                                                                        | 1.2 Introducing smaller pack sizes just before the sell-off                           | <p>“Tinkering with pack sizes is a proven wheeze for off setting the impact of tobacco’s growing tax burden on price per pack. JTI has managed to hit the £6.50 price point by launching 17-packs of Sovereign Blue, Sky Blue, Green and Dual. And it’s just in time; from May, pack sizes will be limited to a minimum of 20 cigs.” Japan Tobacco International [<i>The Grocer</i>, 11 February 2016]</p> <p>“Launching next month as the European Union Tobacco Productive Directive comes into force, [Pall Mall’s] redesign - available in 10-pack and 18-pack King Size and Super King 18s - will include the new Taste Plus Filter ... price-marked packs are set to be available at the current [price].” [<i>The Grocer</i>, 18 April 2016]</p>                                                                                                                                                                                                                                                                                                                                                                                                                                                                                                                                                                                                                                                                                                                                                                                                                                                                                                                                                                                                                                                                                                                             |
|                                                                        | 1.3 Providing financial incentives to retailers to sell a particular company’s brands | <p>“Retailers have reported a “massive” increase in cigarette sales as tobacco manufacturers cut prices and offer cash incentives to bolster brands at a time when new plain packaging and smaller pack regulations are set to shake up the industry. ... An independent retailer... said: “I have seen a massive increase in sales. We were also given PoS including shelf wobblers to encourage as many customers as possible to buy the brand. I think this is a really smart way of driving sales and is something that retailers will respond to.” Meanwhile, Imperial Tobacco will knock 10p off the price of four of its biggest tobacco brands - Lambert &amp; Butler, JPS, Players and Gold Leaf - from 1 June, while maintaining cash margins... [A retailer who] has been trialling the new Imperial prices at his store... said: “We sold up to one and a half extra outers a week because of the lower price.” [<i>Retail Newsagent</i>, 26 May 2016]</p> <p>“A value brands price war on cigarettes is hurting retailers’ margins and could lead to stores being “lumbered” with a heap of unwanted, unsaleable stock [with legislation changes;] tobacco suppliers have been dropping the prices of cigarette packs at the value end of the market... some manufacturers... selling value cigarettes at a loss to gain market share... Last runs of branded packs are price-marked lowly and [a retailer] told Retail Express that the actions of suppliers will have grave consequences for unsuspecting retailers.</p> <p>“Situations will arise where retailers are taken in by the low, price-marked RRP and buy in bulk, thinking that consumers will jump at the chance to catch the last batches of cheap packs...Come May 20, they’ll find themselves lumbered with packs of cigarettes they can no longer sell, as supply will outstrip demand...It’s a</p> |

|                                                                   |                                                          |                                                                                                                                                                                                                                                                                                                                                                                                                                                                                                                                                                                                                                                                                                                                                                                                                                                                                                                |
|-------------------------------------------------------------------|----------------------------------------------------------|----------------------------------------------------------------------------------------------------------------------------------------------------------------------------------------------------------------------------------------------------------------------------------------------------------------------------------------------------------------------------------------------------------------------------------------------------------------------------------------------------------------------------------------------------------------------------------------------------------------------------------------------------------------------------------------------------------------------------------------------------------------------------------------------------------------------------------------------------------------------------------------------------------------|
|                                                                   |                                                          | <p>unique situation, but the suppliers have stock they need to get rid of. They're cutting the prices down and loss-leading on them [but]Independent retailers certainly can't afford to loss-lead. "...[Another retailer] said: "... Companies downtrading to push their own agendas does not help us at all. I've even heard that certain wholesalers were offered better percentages to buy in these packs, which would obviously be recouped at the other end.""[<i>Better Retailing</i>, 17 February 2017]</p> <p>""The tobacco suppliers will themselves take back any branded packs after the May cut-off," [wholesaler manager] told RN. "They have teams of people calling on retailers and they are notifying them as to the process. They are saying if they have any branded stock left to call their local rep and they will come in and replace it." [<i>Retail Newsagent</i>, 2 March 2017]</p> |
| 2. Maintain brand differentiation through systematic name changes |                                                          | <p>"We recognise that consumers use brand and colour when asking for their pack of cigarettes." Therefore, generally, those products traditionally presented as 'full flavour' would have 'real' or 'original' added to their names and be denoted predominantly by the colour 'red'. All brand variants with the flavour descriptor 'smooth' would change to 'bright' and have 'blue' added, 'menthol' would become 'green' and 'capsule' would become 'crushball'." [<i>Retail Newsagent</i>, 28 October 2016]</p>                                                                                                                                                                                                                                                                                                                                                                                           |
| 3. Focusing on lower price segments                               | Introducing premium features into cheaper price segments | <p>"Living in a post-EUTPD II world... [a retailer reported] "Customers have become more price-sensitive since legislation banned the sale of 10- packs and they are more concerned about how much they can get for their money these days" ...To help retailers tap into the trend for budget tobacco, JTI has relaunched Scottish brand Kensitas Club King Size and dropped its RRP " Yau A. The latest developments from the biggest tobacco brands. [<i>Retail Newsagent</i>, 5 April 2018]</p>                                                                                                                                                                                                                                                                                                                                                                                                            |
| 4. Promote products by innovating exemptions to the legislation   | 4.1 Bevelled edges and resealable packs                  | <p>"In order to re-engage disengaged cash-strapped smokers migrating to lower-priced brands and categories, manufacturers have been "adding value" to their brands through innovation, both on the pack and via the product itself... PMI concentrated on areas such as pack size (extra-large pack sizes), pack type (resealable), cigarette length (compact), microslims, filter type (with a focus on recessed filters) and flavour capsules (including the world's first recessed filter capsule and the world's first double capsule – menthol and peppermint). Pack innovation: Tactile finishes, including raised surfaces such as embossing and bevelled edges... (39)<sup>1</sup> [<i>Euromonitor</i>, July 2016]</p>                                                                                                                                                                                 |
|                                                                   | 4.2 Menthol                                              | <p>"JPS Green Edge will replace it and feature a menthol inner liner within the packaging, which the company claims will be "more effective at transferring flavour to the cigarettes than traditional menthol tips"". Imperial Tobacco [<i>Talking Retail</i>, 24 November 2017]</p>                                                                                                                                                                                                                                                                                                                                                                                                                                                                                                                                                                                                                          |

<sup>1</sup> This Euromonitor report was published two months into the sell-off period. We did find evidence of embossing and raised surfaces on packets prior to the full implementation of the legislation but these changes were lost when standardised packaging came into effect. During the sell-off, filter innovations, capsule innovations, bevelled edges and a pack resealing mechanism on one brand were observed – these changes were able to carry through when packs became standardised. In this study we did not observe extra length cigarettes, a greater volume of cigarettes or microslims.

1  
2  
3  
4  
5  
6  
7  
8  
9  
10  
11  
12  
13  
14  
15  
16  
17  
18  
19  
20  
21  
22  
23  
24  
25  
26  
27  
28  
29  
30  
31  
32  
33  
34  
35  
36  
37  
38  
39  
40  
41  
42  
43  
44  
45  
46

|                                                                                                         |                                                                                                                                                                                                                                                                                                                                                                                                                                                                                                                                                                                                                                                                                                                                                                                                                                                                                                                                                                                                                                                                                                                                                                                                                                                                                                                                                                                                                                           |                                                                                                                                                                                                                                                                                                                                                                                                                                                                                                                                                                                                                                                                                                                                                                                                                                                                                                                                                                                                                         |
|---------------------------------------------------------------------------------------------------------|-------------------------------------------------------------------------------------------------------------------------------------------------------------------------------------------------------------------------------------------------------------------------------------------------------------------------------------------------------------------------------------------------------------------------------------------------------------------------------------------------------------------------------------------------------------------------------------------------------------------------------------------------------------------------------------------------------------------------------------------------------------------------------------------------------------------------------------------------------------------------------------------------------------------------------------------------------------------------------------------------------------------------------------------------------------------------------------------------------------------------------------------------------------------------------------------------------------------------------------------------------------------------------------------------------------------------------------------------------------------------------------------------------------------------------------------|-------------------------------------------------------------------------------------------------------------------------------------------------------------------------------------------------------------------------------------------------------------------------------------------------------------------------------------------------------------------------------------------------------------------------------------------------------------------------------------------------------------------------------------------------------------------------------------------------------------------------------------------------------------------------------------------------------------------------------------------------------------------------------------------------------------------------------------------------------------------------------------------------------------------------------------------------------------------------------------------------------------------------|
| <p>4.3 Filters (another way to create the perception that some products are healthier than others?)</p> | <p>Marlboro Touch, previously known as Marlboro Gold Touch, now has a soft touch pack and firm filter keeping the consistency with the rest of the Marlboro range. The firm filter allows adult smokers a cleaner way to stub out their cigarette, as well as adding an overall feeling of quality, without having an impact upon taste.” [Talking Retail, 31 July 2015]</p> <p>“Launching ...as the European Union Tobacco Productive Directive comes into force, [Pall Mall’s] redesign... will include the new Taste Plus Filter that aims to create a firmer in-hand feel and improve filtration” [The Grocer, 18 April 2016]</p> <p>“...JPS Triple Flow... "a revolution in cigarette technology." Triple Flow uses "unique" "easy draw" channels, with a new, "high quality smooth" tobacco blend enhanced by a mineral filter that provides "a fuller smoking experience". Each cigarette is also wrapped in a special paper, designed to actively reduce the amount of smoke emitted - which may result in less smell, says Imperial. Brand portfolio manager Emma Stew said: "Smooth blends now account for almost a quarter [ITUK estimates September 2015] of factory made cigarette (FMC) sales, and Triple Flow has been designed to offer the ultimate smooth smoking experience. ‘With its next generation features and distinctive packaging, there is nothing like it in the market’” [Wholesale News November 2015]</p> | <p>Imperial Tobacco brand manager Jamie Burns-Smith said: “Natura taps into an increasing consumer desire for responsibly sourced products. Crafted from 100% hemp, Natura papers and tips are the perfect sustainable way to enjoy an authentic tobacco taste. Imperial Tobacco has also launched Rizla Menthol Tips, as the company claims “menthol tips are the fastest-growing segment of the tips market”. [Talking Retail, 3 August 2017]</p>                                                                                                                                                                                                                                                                                                                                                                                                                                                                                                                                                                     |
| <p>4.4 RYO papers and filter tips</p>                                                                   | <p>4.5 Cigars</p>                                                                                                                                                                                                                                                                                                                                                                                                                                                                                                                                                                                                                                                                                                                                                                                                                                                                                                                                                                                                                                                                                                                                                                                                                                                                                                                                                                                                                         | <p>“Break, as they are cigarillos, are exempt. We can do packs of less than 20, and we can do flavours... Cigars won’t be a standard colour pack, and will still have product name branding... you can sell individually and in 10 packs” Jens Christiansen, Scandinavian Tobacco Group’s head of marketing &amp; public affairs [Retail Express, 6 June 2016]</p> <p>“Cigars benefit from the fact they can be sold in 10-packs, while also being exempt from certain branding restrictions. Scandinavian Tobacco Group (STG) is using this to its advantage and its marketing this year... the packaging stands out when compared to traditional cigarettes... and the investment made by companies such as STG to raise awareness and education in the convenience trade really helps... Ritmeester’s says miniature cigars have traditionally been products that are better known among tobacco enthusiasts. As a result, it is offering samples of its Royal Dutch range to retailers to increase awareness...</p> |

|  |                              |                                                                                                                                                                                                                                                                                                                                                                                                                                                                                                                                                                                                                                                                                                                                                                                                                                                                                                                                                                                                                                                                                                                                                                                                                                     |
|--|------------------------------|-------------------------------------------------------------------------------------------------------------------------------------------------------------------------------------------------------------------------------------------------------------------------------------------------------------------------------------------------------------------------------------------------------------------------------------------------------------------------------------------------------------------------------------------------------------------------------------------------------------------------------------------------------------------------------------------------------------------------------------------------------------------------------------------------------------------------------------------------------------------------------------------------------------------------------------------------------------------------------------------------------------------------------------------------------------------------------------------------------------------------------------------------------------------------------------------------------------------------------------|
|  |                              | <p>"I find the curry socials Ritmeester holds with retailers and the trade press very useful. It's a hands-on, but informal way of learning about the latest developments in the cigar market. There isn't as much awareness about cigars as cigarettes. These opportunities give us a chance to learn about how we can upsell to smokers who want value." [Retailer]" [<i>Retail Newsagent</i>, 5 April 2018]</p> <p>"If a smoker only has £5 on them, they cannot buy from your gantry, but if you present them with cigars they can." Ritmeester [<i>Retail Express</i>, 17 September 2017]</p> <p>"[Retailer] says he struggles with selling Mini Moods. [Ritmeester's] Lyles explains: "It might be because you're aiming them at cigar smokers, but it's primarily aimed at cigarette smokers. Because of the double filter, it makes for a smoother smoke." ... Cigars are now the cheapest product in a gantry. Lyles says: "If a smoker only has £5 on them, they cannot buy from your gantry, but if you present them with cigars they can." [<i>Retail Express</i>, 17 September 2017]</p> <p>"The margins we make on miniature cigars are 30% when sold at RRP' [Retailer]" [<i>Retail Newsagent</i>, 5 April 2018]</p> |
|  | 4.6 Pipe tobacco sold as RYO | <p>"The sell-through period for branded RYO and cigarettes ended last week, with products now sold in minimum formats and carrying larger health warnings as part of the new tobacco legislation. Yet, UK tobacco manufacturer Gawith Hoggarth is promoting its Kendal brand as a product which is cut to pipe tobacco regulations but can also be used as hand-rolling tobacco. "We've cut the tobacco to the thinnest width we are allowed to which means we can sell it in branded packaging and in 12.5g pouches," said the company's area sales manager Martin Bobbette. The company hopes retailers will recommend the product to smokers who ask for "whatever is cheapest"" [<i>Retail Newsagent</i>, 25 May 2017]</p>                                                                                                                                                                                                                                                                                                                                                                                                                                                                                                      |

Table S3 Compliance with standardised packaging over time<sup>1</sup>

|        | % standardised packs | change from previous month | total sticks sold  | non-compliant sticks sold                |
|--------|----------------------|----------------------------|--------------------|------------------------------------------|
| Jul-16 | 0%                   |                            | 2,574,340,308      | 2,574,204,015                            |
| Aug-16 | 0%                   | 0%                         | 2,620,104,622      | 2,610,727,340                            |
| Sep-16 | 1%                   | 1%                         | 2,424,692,602      | 2,397,886,927                            |
| Oct-16 | 3%                   | 2%                         | 2,491,577,487      | 2,423,864,794                            |
| Nov-16 | 4%                   | 1%                         | 2,424,660,803      | 2,323,057,266                            |
| Dec-16 | 9%                   | 4%                         | 2,593,371,625      | 2,370,713,888                            |
| Jan-17 | 21%                  | 12%                        | 2,316,632,301      | 1,829,871,306                            |
| Feb-17 | 45%                  | 24%                        | 2,184,811,712      | 1,204,205,686                            |
| Mar-17 | 64%                  | 20%                        | 2,402,514,817      | 852,983,422                              |
| Apr-17 | 79%                  | 14%                        | 2,386,041,031      | 506,014,392                              |
| May-17 | 91%                  | 12%                        | 2,475,338,965      | 228,361,777                              |
| Jun-17 | 97%                  | 6%                         | 2,359,196,539      | 81,803,934                               |
| Jul-17 | 98%                  | 1%                         | 2,461,000,857      | 53,453,290                               |
| Aug-17 | 98%                  | 0%                         | 2,412,267,420      | 43,336,437                               |
| Sep-17 | 99%                  | 0%                         | 2,267,864,526      | 29,804,540                               |
| Oct-17 | 99%                  | 0%                         | 2,303,639,526      | 27,803,694                               |
| Nov-17 | 99%                  | 0%                         | 2,231,013,199      | 25,718,138                               |
|        |                      |                            | total thousands of | non-compliant*<br>(thousands of kg sold) |
| RYO    |                      |                            | kg sold            |                                          |
| Aug-16 | 1%                   |                            | 552287             | 546963                                   |
| Sep-16 | 1%                   | 0%                         | 521917             | 516721                                   |
| Oct-16 | 11%                  | 10%                        | 528560             | 469493                                   |
| Nov-16 | 18%                  | 7%                         | 518188             | 424040                                   |
| Dec-16 | 26%                  | 8%                         | 541359             | 400109                                   |
| Jan-17 | 44%                  | 18%                        | 516174             | 288710                                   |
| Feb-17 | 55%                  | 11%                        | 490464             | 218940                                   |
| Mar-17 | 75%                  | 20%                        | 539695             | 132601                                   |
| Apr-17 | 91%                  | 16%                        | 534343             | 45509                                    |
| May-17 | 97%                  | 5%                         | 557734             | 19294                                    |
| Jun-17 | 98%                  | 2%                         | 539118             | 9037                                     |
| Jul-17 | 99%                  | 1%                         | 559731             | 5908                                     |
| Aug-17 | 99%                  | 0%                         | 560994             | 4609                                     |
| Sep-17 | 99%                  | 0%                         | 536870             | 2984                                     |
| Oct-17 | 99%                  | 0%                         | 542052             | 2802                                     |
| Nov-17 | 100%                 | 0%                         | 530219             | 2511                                     |

\*RYO estimated to be sold in standardised packaging if sold in 30g or larger not pricemarked pack and (a) 30g pack of same variant on the market or (b) if 30g pack never available, pack on the market at end of analysis period)

Table S3 Menthol and capsule innovation

|                  | Present at start |       | New Variant |       |    | Total |
|------------------|------------------|-------|-------------|-------|----|-------|
|                  | N                | %     | N           | %     | N  | %     |
| <b>Menthol*</b>  |                  |       |             |       |    |       |
| FM premium       | 9                | 28%   | 2           | 20%   | 11 | 26.2  |
| FM midprice      | 8                | 25%   | 0           | 0%    | 8  | 19.0  |
| FM value         | 8                | 25%   | 4           | 40%   | 12 | 28.6  |
| FM subvalue      | 3                | 9%    | 3           | 30%   | 6  | 14.3  |
| no price segment | 4                | 13%   | 1           | 10%   | 5  | 11.9  |
|                  | 32               | 76.2% | 10          | 23.8% | 42 | 100.0 |
| <b>Capsule**</b> |                  |       |             |       |    |       |
| FM premium       | 2                | 15%   | 0           | 0%    | 2  | 10.5  |
| FM midprice      | 2                | 15%   | 0           | 0%    | 2  | 10.5  |
| FM value         | 9                | 69%   | 3           | 50%   | 12 | 63.2  |
| FM subvalue      | 0                | 0%    | 3           | 50%   | 3  | 15.8  |
| Total            | 13               | 68.4% | 6           | 31.6% | 19 | 100.0 |

\*Menthol: variant name includes 'menthol' or 'green'

\*\*Capsule: variant name includes 'capsule', 'crushball', 'dual', 'duo', 'demand', 'click on' or 'burst'

Table S4 Euromonitor estimates of the growth of cigars and cigariillos

|      | value constant £ mln | value current £ mln | volume million units |
|------|----------------------|---------------------|----------------------|
| 2015 | 291.8                | 289.9               | 390.4                |
| 2016 | 282.5                | 282.5               | 382.8                |
| 2017 | 324.5                | 332.6               | 451.6 estimate       |
| 2018 | 347.8                | 366.3               | 493.8 estimate       |

# Original protocol of the study

This paper is one of four covered by the original protocol. We have extracted sections relevant to this paper below and provided notes on where the eventual paper diverged.

## Extracts from original protocol

### *Intended output*

Changes in the number, names and visual appearance of packs (Research Question 1 (see below)): led by KER. A first draft will be produced by December 2017 based on analysis of the pack data and made available to CRUK at this point. Additional analyses of Nielsen and HMRC data<sup>1</sup> and the commercial literature ((see below) will contribute to a final paper on this topic which will be produced in December 2018.

*Research Question 1: Changes in the number, names and visual appearance of brands and brand variants.*

### Pack purchasing data

Photographs will be taken of each surface of each pack and entered into NVivo for visual analysis<sup>2</sup>. We will use this to examine changes in packaging colours, shapes, product descriptors and fonts over time. We will specifically aim to explore whether these changes might be aimed to reassure smokers that standardised packaging does not mean compromises in taste or quality. An analysis of relevant articles in the commercial literature will be used to triangulate our findings.

### Nielsen & HMRC<sup>1</sup> data

Building on evidence from Australia that a number of new brand variants were released by the tobacco industry prior to the enactment of standardised packaging, we will use both HMRC<sup>1</sup> and Nielsen data to provide a descriptive analysis of changes in the names and numbers of brand variants on the market, identifying the price segments within which the new brand variants sit. We will specifically seek to examine whether more descriptive brand names are introduced given that the pack design will no longer be able to convey messages of flavour, for example. The Nielsen interim extract (see below) will be used for this analysis which will be supported with our commercial literature review. We will present our findings using descriptive statistics and graphs.

### Data sources:

#### *Pack purchasing*

Australian evidence suggests there were changes in the packaging of cigarettes prior to standardised packaging that would not be recorded in Nielsen data which only records brand variant names, price and volumes. For these reasons we propose to complement our Nielsen data with bespoke collected data.

1  
2  
3 We plan to buy, on a monthly basis, a leading brand from each of the four FMC price segments  
4 (premium, mid price, economy and ultra low price) and three RYO price segments (premium, mid  
5 price and economy)<sup>3</sup>, to record changes over time in visual appearance of the packaging (including  
6 the font used for brand names, brand descriptors, colours, pack shapes) prior to standardised  
7 packaging becoming compulsory. We will supplement this with screen shots of brand variants from  
8 my supermarket.com, first using the purchased products to determine if the online pictures are  
9 regularly updated<sup>2</sup>.

#### 12 Robustness

13  
14 This data will be collected by our research team. Collection will take place on the same day each  
15 month and from the same store. Store visits will also be used to explore changes in sale of pipe  
16 tobacco and whether RYO tobacco is being sold as pipe tobacco and if so, such products will be  
17 purchased too.

#### 19 Availability and coverage

20  
21 We will collect data from January<sup>4</sup> 2016 until May 2017 (the month when full implementation starts).

#### 23 Commercial literature

24  
25 We will update two reviews of the commercial literature we have recently undertaken applying the  
26 same review methodology. Specifically, we will review the following sources, identifying and  
27 reviewing articles on pricing, price segmentation, new brand variants and impacts of plain packaging  
28 on, inter alia, volumes and consumer behaviour.

29  
30 We will use this literature in four ways. First, [not relevant to this paper]. Second, to record any  
31 discussion of standardised packaging and its impacts. This will be important in alerting us to any new  
32 lines of inquiry that might be needed to defend against emergent tobacco industry arguments. Third,  
33 it will be used to triangulate our findings, including those on pack appearance and new brand variants  
34 because the commercial literature is often used to flag new products or changes to existing products.  
35 Finally, [not relevant to this paper].

36  
37 The literature review will cover the period from January 2015 to December 2017 and will include the  
38 following sources<sup>5</sup>:

- 39  
40  
41 • Retail publications:
  - 42 o The Grocer
  - 43 o Retail News
  - 44 o The Wholesaler
  - 45 o Convenience Store
  - 46 o Asian Trader
- 47  
48 • Market and financial analyst reports:
  - 49 o Euromonitor reports
  - 50 o Citigroup reports
  - 51 o Redburn reports
- 52  
53 • Tobacco company reports including:
  - 54 o Annual reports
  - 55 o Tobacco company presentations to analysts

56  
57  
58  
59 Nielsen data<sup>6</sup>



1  
2  
3 As extracts cover three year periods we propose to only use data over a three year period in any  
4 particular analysis.  
5

6 1) Interim extract  
7

8 Dates: Sept 2014 to August 2017 (20 months pre-implementation period data, twelve months  
9 transition period, and three months full implementation period data).  
10

11 This extract will be used for Research Question 1... Doing this on an interim extract will enable us to  
12 proceed more quickly with our analysis.  
13

## 14 Notes on changes from protocol

15 <sup>1</sup>. HMRC data was only included as a possibility. We were eventually unable to obtain HMRC data.  
16

17 <sup>2</sup>. The visual changes in the purchased packs were limited. Instead, we developed the novel advert  
18 analysis.  
19

20 <sup>3</sup>. We included an extra BAT FM brand in order to include brands from all major tobacco companies  
21 rather than a brand from the small RYO value segment.  
22

23 <sup>4</sup>. Funding was not confirmed until March 2016 when we started the purchasing.  
24

25 <sup>5</sup>. Some sources were changed due to our understanding of work being undertaken by other research  
26 groups and due to insufficient focus on the UK market and/or standardised packaging in scoping  
27 work.  
28

29 <sup>6</sup>. To understand product name changes we eventually compared product names in nine different  
30 Nielsen extracts in order to look for changes. At the time of analysis, the extract available to us  
31 allowed us to end our analyses in November 2017 giving us three extra months than was expected.  
32  
33  
34  
35  
36  
37  
38  
39  
40  
41  
42  
43  
44  
45  
46  
47  
48  
49  
50  
51  
52  
53  
54  
55  
56  
57  
58  
59  
60

# BMJ Open

## A prospective longitudinal study of tobacco company adaptation to standardised packaging in the UK: identifying circumventions and closing loopholes

|                                                                                                                                                         |                                                                                                                                                                                                                                                                                                                                                                                          |
|---------------------------------------------------------------------------------------------------------------------------------------------------------|------------------------------------------------------------------------------------------------------------------------------------------------------------------------------------------------------------------------------------------------------------------------------------------------------------------------------------------------------------------------------------------|
| Journal:                                                                                                                                                | <i>BMJ Open</i>                                                                                                                                                                                                                                                                                                                                                                          |
| Manuscript ID                                                                                                                                           | bmjopen-2018-028506.R1                                                                                                                                                                                                                                                                                                                                                                   |
| Article Type:                                                                                                                                           | Original research                                                                                                                                                                                                                                                                                                                                                                        |
| Date Submitted by the Author:                                                                                                                           | 05-Jun-2019                                                                                                                                                                                                                                                                                                                                                                              |
| Complete List of Authors:                                                                                                                               | Evans-Reeves, Karen; University of Bath, Tobacco Control Research Group, Department for Health<br>Hiscock, Rosemary; University of Bath, Tobacco Control Research Group, Department for Health<br>Lauber, Kathrin; University of Bath, Tobacco Control Research Group, Department for Health<br>Gilmore, Anna; University of Bath, Tobacco Control Research Group, Department for Health |
| <b>Primary Subject Heading</b>:                                                                                                                         | Smoking and tobacco                                                                                                                                                                                                                                                                                                                                                                      |
| Secondary Subject Heading:                                                                                                                              | Public health                                                                                                                                                                                                                                                                                                                                                                            |
| Keywords:                                                                                                                                               | PUBLIC HEALTH, PREVENTIVE MEDICINE, TOBACCO, STANDARDISED PACKAGING                                                                                                                                                                                                                                                                                                                      |
| Note: The following files were submitted by the author for peer review, but cannot be converted to PDF. You must view these files (e.g. movies) online. |                                                                                                                                                                                                                                                                                                                                                                                          |
| Video 1.MP4                                                                                                                                             |                                                                                                                                                                                                                                                                                                                                                                                          |

SCHOLARONE™  
Manuscripts

1  
2  
3  
4 A prospective longitudinal study of tobacco company  
5 adaptation to standardised packaging in the UK:  
6 identifying circumventions and closing loopholes  
7  
8  
9  
10  
11

12 Karen A Evans-Reeves<sup>1</sup>, email [K.A.Evans-Reeves@bath.ac.uk](mailto:K.A.Evans-Reeves@bath.ac.uk)

13  
14 Rosemary Hiscock<sup>1\*</sup>, email [R.Hiscock@bath.ac.uk](mailto:R.Hiscock@bath.ac.uk)

15  
16 Kathrin Lauber<sup>1</sup>, email [K.Lauber@bath.ac.uk](mailto:K.Lauber@bath.ac.uk)

17  
18 Anna B Gilmore<sup>1</sup>, email [A.Gilmore@bath.ac.uk](mailto:A.Gilmore@bath.ac.uk)

19  
20 <sup>1</sup>Tobacco Control Research Group, University of Bath and UK Centre of Tobacco and Alcohol Studies,  
21 Bath, UK

22  
23 \*Corresponding author: +44 (0)1225 388388

24  
25  
26  
27 **Key words:** tobacco, tobacco industry, standardised packaging, plain packs  
28  
29  
30  
31  
32  
33  
34  
35  
36  
37  
38  
39  
40  
41  
42  
43  
44  
45  
46  
47  
48  
49  
50  
51  
52  
53  
54  
55  
56  
57  
58  
59  
60

## Abstract

**Objectives:** UK standardised packaging legislation was introduced alongside pack size and product descriptor restrictions of the European Union Tobacco Products Directive to end tobacco marketing and misinformation via the pack. This paper aims to assess compliance with the restrictions and identify attempts to continue to market tobacco products and perpetuate misperceptions of harm post-legislation.

**Design, setting and intervention:** A prospective study of the introduction of standardised packaging of tobacco products to the UK.

**Participants and outcomes:** We analysed commercial sales data to assess whether the legally required changes in pack branding, size and name were implemented. To explore any adaptations to products and packaging we analysed sales data, monthly pack purchases of factory-made cigarettes (FM) and roll-your-own tobacco (RYO), tobacco advertisements from retail trade magazines and articles on tobacco from commercial literature (retail trade, market analyst and tobacco company publications).

**Results:** One month post full implementation of the UK and EU policies, 97% FM and 98% RYO was sold in compliant packaging. Nevertheless tobacco companies made adaptations to tobacco products which enabled continued brand differentiation after the legislation came into force. For example, flavour names previously associated with low tar were systematically changed to colour names arguably facilitating continued misperceptions about the relative harms of products. Tobacco companies used the one-year sell-through to their advantage by communicating brand name changes and providing financial incentives for retailers to buy large volumes of branded packs. In addition, tobacco companies continued to market their products to retailers and customers by innovating exemptions to the

1  
2  
3 legislation, namely, filters, packaging edges, seals, multipack outers, RYO accessories,  
4  
5  
6 cigars and pipe tobacco.  
7

8  
9 **Conclusions:** Tobacco companies adapted to packaging restrictions by innovating their  
10  
11 tobacco products and marketing activities. These findings should enable policy makers  
12  
13 globally to close loopholes and increase the potential efficacy of standardised packaging  
14  
15 policies.  
16  
17

18  
19  
20  
21  
22  
23  
24  
25  
26  
27  
28  
29  
30  
31  
32  
33  
34  
35  
36  
37  
38  
39  
40  
41  
42  
43  
44  
45  
46  
47  
48  
49  
50  
51  
52  
53  
54  
55  
56  
57  
58  
59  
60

For peer review only

# Article Summary

## Strengths and limitations of the study

### Strengths

- The strength of this paper lies both in the detail and depth of each analysis including our systematic analysis of retail-press advertisements (n=195) and commercial literature articles and reports (n= 396) alongside pack purchases of eight top-selling brands and detailed sales information from Nielsen.
- Using multiple data sources has enabled findings to be verified by more than one source and enabled a greater understanding of the tobacco industry's motives for changes and innovations to their products and packaging. This insight would not have been possible using one dataset in isolation.
- By using the commercial literature we were able to plug gaps in our knowledge, for example, we did not have Nielsen data on cigars or pipe tobacco but information in the retail and commercial literature revealed that these products were targets for innovation.

### Limitations

- Nielsen data did not tell us whether RYO packs were in branded or standardised packaging. Given that a minimum of RYO pack size of 30g was a requirement of the TPD we assumed that new 30g RYO packs would switch to standardised packs at the same time.
- We do not know the extent to which Nielsen variant name changes lag behind and even reflect those printed on packs in retailers. However, we are reassured that the

1  
2  
3 main name change patterns found in the Nielsen data were similar to those found in  
4  
5  
6 a previous UK convenience store study.  
7  
8

9 **Funding:** This work was supported by Cancer Research UK grant number C27260/A23168.

10  
11 The authors are members of the UK Centre for Tobacco & Alcohol Studies, a UK Clinical  
12  
13 Research Collaboration Public Health Research Centre of Excellence whose work is  
14  
15 supported by funding from the Medical Research Council, British Heart Foundation, Cancer  
16  
17 Research UK, Economic and Social Research Council, and the National Institute for Health  
18  
19 Research under the auspices of the UK Clinical Research Collaboration (MR/K023195/1).  
20  
21  
22  
23  
24  
25  
26  
27  
28  
29  
30  
31  
32  
33  
34  
35  
36  
37  
38  
39  
40  
41  
42  
43  
44  
45  
46  
47  
48  
49  
50  
51  
52  
53  
54  
55  
56  
57  
58  
59  
60

27 **Competing Interests:** The authors have no competing interests.

## Background

Standardised tobacco packaging, one of the most significant policy threats to the tobacco industry in recent years, came into force in the UK on May 20<sup>th</sup> 2016. From this date all new factory made (FM) cigarettes and roll your own (RYO) tobacco, manufactured or imported for UK consumption were to be sold in standardised packaging. Tobacco companies were given until May 20<sup>th</sup> 2017 to comply with the law; a period referred to as the 'sell-through'. During this time, companies were not permitted to print any new branded packets(1, 2). The UK legislation(1) was implemented in concert with the revision of the 2001 European Union (EU) Tobacco Products Directive (TPD)(3) which placed further restrictions on packaging and naming of brands (Box 1)(3).

After Australia became the first country to introduce standardised packaging in December 2012, tobacco companies responded with more evocative and descriptive tobacco product names, including colours to represent the previous pack colour, thereby continuing the connotations associated with these colours(4, 5). Simultaneously companies reduced the total number of brands sold and renewed their focus on value for money brands by increasing the number and length of cigarettes in a pack and introducing menthol variants in this price range.(6) In response to standardised packaging in New Zealand and other markets there has been a significant increase in flavour capsule variants (FCVs) across all market price points,(7) which may threaten standardised packaging's effect on deterring smoking initiation given that these products appeal more to non-smokers and non-daily smokers than to daily smokers.(8, 9)

While the UK and EU legislation combined closed some of loopholes in the Australian legislation, by prohibiting product names that create an erroneous impression about the



1  
2  
3 health effects and requiring minimum pack sizes for both cigarettes and RYO,(10) concerns  
4 remain. The current legislation permits the use of colour descriptors, bevelled edges on  
5  
6 packs, cigarette filter technology innovations and the TPD ban on menthol flavouring  
7  
8 (including capsule technology) does not come into force until May 2020. Furthermore, cigars,  
9  
10 cigarillos and pipe tobacco and RYO filter tips are exempt from the legislation and are still  
11  
12 sold in branded packaging, while wholesaler multipacks are still allowed branded 'outer'  
13  
14 wraps.  
15  
16  
17  
18  
19

20  
21 Recently published research suggests that, prior to the full implementation of standardised  
22  
23 packaging in the UK, tobacco companies added smaller pack sizes such as 17 sticks to their  
24  
25 brand variant portfolios,(11) introduced colour descriptors to brand family and brand variant  
26  
27 names and made product changes, particularly to FM cigarette filters.(12) Examples of  
28  
29 name change patterns associated with UK standardised packaging restrictions have been  
30  
31 described qualitatively (10, 12, 13) but not quantitatively. The scale of these name changes  
32  
33 and if/how these changes were communicated to the public is not clear from published  
34  
35 research. Previous work has also only explored up to two months post-legislation.  
36  
37  
38  
39

40  
41 Therefore, the purpose of this paper was to use mixed methods to combine data from four  
42  
43 different data sources up to seven months post full-implementation to systematically and  
44  
45 rigorously examine how compliant tobacco companies were with the legislation, and to  
46  
47 explore any attempts they made to circumvent including any actions to reduce the immediate  
48  
49 impact of the legislation during the sell-through. We assessed how the sell-through period  
50  
51 was used, how and if tobacco company marketing adapted including any changes to  
52  
53 products or packaging that would endure after the legislation was fully implemented, and  
54  
55 whether and how products were marketed to retailers and consumers. The findings of this  
56  
57  
58  
59  
60

1  
2  
3 paper have global significance as they can help close loopholes during the design and  
4  
5  
6 implementation of standardised packaging legislation in other jurisdictions.  
7  
8  
9  
10  
11  
12  
13  
14  
15  
16  
17  
18  
19  
20  
21  
22  
23  
24  
25  
26  
27  
28  
29  
30  
31  
32  
33  
34  
35  
36  
37  
38  
39  
40  
41  
42  
43  
44  
45  
46  
47  
48  
49  
50  
51  
52  
53  
54  
55  
56  
57  
58  
59  
60

For peer review only

BOX 1. Summary of restrictions UK Standardised packaging legislation and the European Union Tobacco Products Directive Revision (implemented 20 May 2016 – 20 May 2017)

### EU TOBACCO PRODUCTS DIRECTIVE

PACKAGING OPENING: A unit packet of cigarettes may consist of carton or soft material and shall not have an opening that can be reclosed or re-sealed after it is first opened, other than the flip-top lid and shoulder box with a hinged lid. For packets with a flip-top lid and hinged lid, the lid shall be hinged only at the back of the unit packet.

PACK SIZE: Cigarette packs must contain a minimum of 20 cigarettes & RYO tobacco must contain at least 30 grams of tobacco.

IMPRESSION CREATION: There must be no packaging elements that create an erroneous impression about the characteristics, health effects, risks or emissions of tobacco.

TOBACCO INGREDIENTS: No description of nicotine, tar or carbon monoxide content of a tobacco product.

FLAVOUR DESCRIPTION: No reference to taste, smell or any flavourings or additives or the absence of any such thing.

FLAVOURINGS (May 2020): No flavourings in any components such as filters, papers, packages, capsules or any technical features allowing modification of the smell or taste of tobacco products.

ENVIRONMENT: No suggestion that a particular tobacco product has improved biodegradability or other environmental advantages.

RESEMBLANCE: No resemblance to a food or cosmetic product.

PROMOTION: No suggestion of economic advantage of one product over another – no price marked packs.

### UK STANDARDISED PACKAGING

PACK EXTERNAL COLOUR: External packaging of cigarettes or RYO tobacco is Pantone 448C (matt finish).

PACK INTERNAL COLOUR: Internal colour of cigarette or RYO packaging must be white or Pantone 448C (matt finish).

1  
2  
3  
4 NOISE AND SMELL: Packaging must not make a noise or produce a smell that is not  
5 normally associated with the packaging.  
6

7 PACKAGING EVOLUTION: The packaging must not change after retail sale, for example,  
8 heat activated inks, embellishments designed to appear gradually over time, scratch  
9 panels etc.  
10  
11

12 PACKAGING SHAPE: Cigarette packets must be made of carton or soft material and be  
13 cuboid in shape & RYO may be in a cuboid box, a cylinder or a pouch (bevelled or  
14 rounded edges are permitted).  
15  
16  
17

18 STICK DESIGN: Cigarette stick paper must be plain white (matt finish), the filter must only  
19 be coloured in such a way as to imitate cork. The stick may have the brand name and  
20 variant printed in black Helvetica type no larger than 8 point in normal weighted regular  
21 typeface not more than 38 mm from the filter end of the cigarette. The start of each word  
22 can be an upper case letter but the rest of the word must be lower-case.  
23  
24  
25  
26  
27

28  
29  
30  
31  
32  
33  
34  
35  
36  
37  
38  
39  
40  
41  
42  
43  
44  
45  
46  
47  
48  
49  
50  
51  
52  
53  
54  
55  
56  
57  
58  
59  
60

er review only

## Methods

### Data Sources

We utilised four data sources, 1) purchases of eight top-selling tobacco brands; 2) tobacco advertisements in popular retail trade publications; 3) other commercial literature: retail press articles and advertorials, tobacco company annual reports and Euromonitor market analyst reports; and 4) Nielsen data. (Figure 1) While compliance with the legislation was primarily assessed using the Nielsen data, the evidence collected from each data source was utilised to assess whether, and how, tobacco companies adapted to the legislation and continued to market their products. We triangulated data from these different datasets, to verify the existence and purpose of adaptations.

### ***Pack Purchasing and observation***

We conducted monthly pack purchases between March 2016 and May 2017 to assess visual and sensory changes over time in the top-selling FM and RYO products (Table 1) for different price segments defined from commercial literature and Nielsen data tobacco price data of sales between 2008 and early 2016(11). We purchased packs from five different FM price segments and two different RYO price segments. We also included BAT's top selling brand in the UK as an addition as BAT did not have a top-selling brand in any of the identified price-segments.

Additionally, we observed price lists of cigar and pipe tobacco brands available in-store and the appearance of 'outers' (the cover wrap used to bind multiple packs of RYO or FM together for distribution) where visible.

Table 1. Pack purchase data of the top selling brand in each price segment

| Price segment<br>(average price<br>per pack/stick)<br><sup>1</sup> [ref Nielsen<br>paper] | Top selling products name & packsize                                     |                                                                   | Co<br>4            |
|-------------------------------------------------------------------------------------------|--------------------------------------------------------------------------|-------------------------------------------------------------------|--------------------|
|                                                                                           | March 2016 (start of sell-through)                                       | May 2017 (full-implementation)                                    |                    |
| FM                                                                                        |                                                                          |                                                                   |                    |
| Premium<br>(£6.76/£0.42)                                                                  | Marlboro Gold (20s)                                                      | Marlboro Gold (20s)                                               | PM<br>I            |
| Midprice <sup>2</sup><br>(£5.61/£0.36)                                                    | L&B Original Lambert & Butler Silver<br>(20s)<br>Mayfair King Size (19s) | Lambert & Butler Original Silver (20s)<br>Mayfair King Size (20s) | IM<br>T<br>JTI     |
| Value<br>(£5.10/£0.33)                                                                    | L&B Blue Lambert & Butler Real Blue<br>(19s)                             | L&B Blue Real Blue(20s)                                           | IM<br>T            |
| Subvalue<br>(£4.68/£0.29)                                                                 | Carlton Red (19s)<br>Rothmans of London <sup>3</sup> (17s)               | Carlton Red (20s)<br>Rothmans Blue (20s)                          | IM<br>T<br>BA<br>T |
| RYO <sup>5</sup>                                                                          |                                                                          |                                                                   |                    |
| Premium<br>(£6.97/£0.17)                                                                  | Golden Virginia The Original (25g)                                       | Golden Virginia The Original (30g)                                | IM<br>T            |
| Midprice<br>(£5.81/£0.15)                                                                 | Amber Leaf (25g)                                                         | Amber Leaf Original (30g)                                         | JTI                |

<sup>1</sup> weighted average price per pack/stick of all products sold within tobacco industry price segments as described by previous analysis (Dec 2015 prices – inflation adjusted to 2008 values). One RYO stick was estimated to be 0.5g tobacco(11, 14).

<sup>2</sup>Midprice was originally two major segments: Lambert & Butler was the leading upper midprice product and Mayfair the leading lower midprice product

<sup>3</sup>None of the top selling brands in each price range was owned by British American Tobacco. For completeness we added Rothman's of London (a subvalue brand) - the top selling brand for British American Tobacco.

<sup>4</sup>Tobacco company' abbreviations: BAT British American Tobacco, IMT Imperial Tobacco, JTI Japan Tobacco International, PMI Philip Morris International

<sup>5</sup>No RYO value segment (average pack/stick price: £4.28/£0.14) product was purchased due to lower sales volumes even of the leading brand (Gold Leaf) in this segment.

### **Advertisements in the retail press**

We searched hard copies of the most widely circulated paid for retail and wholesale publications *The Grocer*, *Wholesale News* and *Retail Newsagent* between January 2015 and December 2017 for all tobacco advertisements.

We coded 195 advertisements for the attributes marketed to retailers, e.g., new brand variant, packaging, filter, limited edition, price, retailer profit. We examined the distribution of these marketing themes by price segment (Table S1). We separately assessed advertorials for relevance to standardised packaging and noted the main messages communicated.

### **Commercial literature review**

We searched high circulation online retail publications (*The Grocer*, *Wholesale News*, *betterretailing.com* (which includes *Retail Newsagent* and *Retail Express*, *talkingretail.com*), to identify articles relevant to tobacco packaging and marketing (Jan 2015 – Dec 2017; Table 2). We also included two reviews of 2017 published in 2018, Euromonitor reports on tobacco, and tobacco company annual reports covering this period. We used NVivo 10, to

code articles for any evidence of circumvention of the legislation and used quotes taken from the commercial literature as examples of each circumvention (Table S2).

For peer review only



Table 2 Commercial literature review January 2015 to December 2017

| <i>Source</i>                                                             | <i>Search terms (depends on search procedure of website)</i>                                    | <i>Articles/reports found</i> | <i>Articles/reports included in final analysis</i> |
|---------------------------------------------------------------------------|-------------------------------------------------------------------------------------------------|-------------------------------|----------------------------------------------------|
| <b>RETAILER MAGAZINES</b>                                                 |                                                                                                 |                               |                                                    |
| <b>Convenience &amp; independents</b>                                     |                                                                                                 |                               |                                                    |
| Betterretailing.com:<br>Retail Newsagent<br>Retail Express                | "tobacco"                                                                                       | 350                           | 181                                                |
| TalkingRetail.com                                                         | "tobacco"                                                                                       | 50                            | 49                                                 |
|                                                                           |                                                                                                 |                               |                                                    |
| <b>Wholesalers &amp; FMCG</b>                                             |                                                                                                 |                               |                                                    |
| Wholesale News                                                            | "tobacco" or "cigarette" or "ryo" or "roll+your+own" or "hand+rolled" or "cigar" or "cigarillo" | 54                            | 30                                                 |
| The Grocer                                                                | "tobacco" or "cigarette" or "ryo" or "roll+your+own" or "hand+rolled" or "cigar" or "cigarillo" | 820                           | 104                                                |
|                                                                           |                                                                                                 |                               |                                                    |
| <b>INDUSTRY ANALYST</b>                                                   |                                                                                                 |                               |                                                    |
| Euromonitor Passport                                                      | "tobacco"                                                                                       | NA                            | 20                                                 |
|                                                                           |                                                                                                 |                               |                                                    |
| <b>TOBACCO COMPANY</b>                                                    |                                                                                                 |                               |                                                    |
| Annual reports from the big four tobacco companies: JTI, IMT, BAT and PMI | Annual reports                                                                                  | 12                            | 12                                                 |
| <b>TOTAL</b>                                                              |                                                                                                 | 1286                          | 396                                                |

**Nielsen Data**

1  
2  
3 Nielsen collates data on tobacco sales from nearly 90% of UK supermarkets and a stratified  
4  
5 sample of 15% of convenience stores(11). For each product, Nielsen records hierarchically  
6  
7 the tobacco brand, brand family, brand variant and then specific features of the pack  
8  
9 denoted by a unique serial number known as a SKU (e.g. size, pricemarked)(11). In  
10  
11 November 2017 there were 71 brands, 97 families, 241 variants, and 1022 SKUs (Table 3).  
12  
13  
14  
15  
16  
17  
18  
19  
20  
21  
22  
23  
24  
25  
26  
27  
28  
29  
30  
31  
32  
33  
34  
35  
36  
37  
38  
39  
40  
41  
42  
43  
44  
45  
46  
47  
48  
49  
50  
51  
52  
53  
54  
55  
56  
57  
58  
59  
60

For peer review only

Table 3 Hierarchical brand architecture available from the Nielsen data

| Hierarchy of Nielsen data                                                                                                                                                                                | Example                                                             | N (UK market) |          |
|----------------------------------------------------------------------------------------------------------------------------------------------------------------------------------------------------------|---------------------------------------------------------------------|---------------|----------|
|                                                                                                                                                                                                          |                                                                     | July 2014     | Nov 2017 |
| BRAND                                                                                                                                                                                                    | Marlboro                                                            | 44            | 71       |
| BRAND FAMILY<br>Products with the same brand name but sold at different price points                                                                                                                     | Marlboro <u>Bright Leaf</u>                                         | 114           | 97       |
| BRAND VARIANT<br>Product at same price point but with different length (e.g. superkings, kingsize), flavour or other characteristics                                                                     | Marlboro Bright Leaf <u>Platinum</u>                                | 282           | 241      |
| Stock Keeping Unit (SKU) Each individual barcoded product including specific pack characteristics: pack size, whether the pack is price-marked, and, for FM but not RYO, whether standardised or branded | Marlboro Bright Leaf Platinum <u>10s multipack not price marked</u> | 930           | 1022     |

## Data Analysis

### **Compliance**

1  
2  
3 Monthly Nielsen sales data were used to examine compliance with the removal of branding,  
4  
5  
6 pricemarking and small pack sizes (Box 1), between July 2016 (when the first standardised  
7  
8 packs first were sold)(13) and November 2017. For FM, Nielsen data identifies which packs  
9  
10 are standardised and which branded. For RYO they do not. However, as 30g packs of RYO  
11  
12 were negligible prior to standardised pack legislation RYO packs of 30g or more were  
13  
14 treated as standardised.  
15  
16

### 17 18 **Name changes**

19  
20 We identified the number, names and price segments of all brand variants whose name  
21  
22 changed between July 2014 and November 2017. July 2014 was used as a starting point for  
23  
24 this analysis as we wanted a time before standardised packaging was passed by the  
25  
26 Government in January 2015. We coded and counted whether each name change was  
27  
28 required for compliance with the legislation and recorded the type of name change eg colour  
29  
30 added or adjective added.  
31  
32  
33  
34  
35  
36  
37  
38  
39  
40  
41  
42  
43  
44  
45  
46  
47  
48  
49  
50  
51  
52  
53  
54  
55  
56  
57  
58  
59  
60

### ***Innovation targeting***

To understand whether innovations were targeted at particular price segments, we compared the distribution of name changes and new variants in November 2017 with the distribution of price segments prior to the decision to implement legislation in July 2014. Differences in the number of variants were tested using chi-square tests and Fishers exact tests (when the expected number of cases was less than five). To achieve sufficient numbers for analysis, price segments were merged into four categories: (1) FM premium and midprice, (2) FM value and subvalue, (3) RYO premium and midprice, (4) RYO value.

### ***Patient and Public Involvement***

KER and RH discussed standardised packaging policy with the UK Centre for Tobacco and Alcohol Studies University of Nottingham panel of smokers and former smokers (now known as the Tobacco & Nicotine Discussion Group) in October 2017. The group were asked to discuss their thoughts on and experiences of the policy and whether they had noticed any changes to tobacco products and packs both in the sell-off period and thereafter. These discussions helped inform our research questions but we did not include these discussions in our analysis. Our study did not involve human subjects and therefore we did not seek any further involvement from the panel.

## **Results**

Four main strategies were identified from multiple data sources. We present the evidence for each in turn.

### **Strategy 1: Keep branded packets on the market as long as possible**

1  
2  
3  
4  
5  
6 Six months into the year-long sell-through period, 96% of FM and 82% RYO were still sold in  
7  
8 branded packs (Figure 2 & table S3). Most FM (70%) and RYO (65%) packs switched to  
9  
10 standardised packs between January and April 2017. One month after the full-  
11  
12 implementation of the UK and EU policies, 97% of cigarettes and 98% of RYO were  
13  
14 sold in compliant packaging. By November 2017, non-compliant sales declined to 1%  
15  
16 of FM and negligible volumes of RYO.  
17  
18  
19  
20  
21  
22  
23  
24  
25

26 The commercial literature suggests that tobacco companies produced greater volumes of  
27  
28 their branded FM and RYO tobacco prior to the May 2016 manufacturing deadline to keep  
29  
30 branded packaging on the market for as long as possible during the sell-through(15). Both  
31  
32 the Nielsen data and the adverts and the commercial literature revealed an increase in small  
33  
34 pack sizes ahead of the sell-through period. Tobacco companies offered incentives and  
35  
36 promotions on branded packs to retailers to encourage sales and loyalty to their products,  
37  
38 examples included cash rewards and loyalty points for selling particular brands. By early  
39  
40 2017 manufacturers were described as being in a price-war(16, 17). To allay retailers'  
41  
42 concerns about being left with non-compliant stock after the deadline, tobacco companies  
43  
44 offered to buy them back (Table S2; Strategy 1.3)(18).  
45  
46  
47  
48  
49

50 Overall, tobacco companies decreased the number of brand families and brand variants  
51  
52 between July 2014 and November 2017 as they were consolidating their portfolios and  
53  
54 focusing on the brands which could offer growth. The increase in SKU between 2014 and  
55  
56 2017 reflects (a) the pre-standardised packs increase in small pack sizes, innovations such  
57  
58 as flavours and capsules (b) the addition of standardised packs FM SKU and 30g RYO SKU  
59  
60

1  
2  
3 and (c) that many SKU in branded packs remained on the market in November 2017 but  
4  
5  
6 selling only tiny volumes.  
7  
8  
9

## 10 11 **Strategy 2: Maintaining brand variant differentiation through name changes** 12

13  
14 One third (35%; 123/ 353) of variants changed name between July 2014 and November  
15  
16 2017. Less than half of these changed name to comply with legislation (42%, n=52/123) and  
17  
18 most of these removed flavour names as the legislation required but substituted with other  
19  
20 names, most often a colour (Table 4). Most notably, FM smooth became bright or sky blue,  
21  
22 with RYO smooth changing to yellow and menthol for both FM and RYO changing to green.  
23  
24

25  
26 Of the variants which changed name when it was not necessary for legislative compliance  
27  
28 (N=71/123, 58%), colours were introduced for the first time as a substitute for the previous  
29  
30 pack colour, eg. *Marlboro* with the red chevron on the pack became Marlboro Red. Similarly,  
31  
32 to distinguish brand variants from one another and to continue previous brand variant  
33  
34 identities, other adjectives were added to brand names, most notably adjectives  
35  
36 accompanied a colour, e.g. *real* blue, *bright* silver, *legendary* black. In addition, during the  
37  
38 study period, 23 new variants appeared in the Nielsen dataset with names which included  
39  
40 elements that were novel: 'signature', 'ome', 'silver strand' in May 2015, 'Eagle,' and  
41  
42 'Colours'" in November 2015 and 'Chill' in May 2016 and two different brands added 'Black  
43  
44 Russian' variants in November 2015 and January 2017. Lastly, two new Golden Virginia  
45  
46 RYO variants appeared on the market in November 2015 named 'Midnight' and 'Sunrise'.  
47  
48  
49 Commercial literature revealed that these indicated rich and smooth flavours  
50  
51 respectively(19). The first brand variant in a brand family sometimes had 'original' added e.g.  
52  
53  
54  
55  
56  
57 Amber Leaf RYO became Amber Leaf original.  
58  
59  
60

Table 4. Nielsen data FM and RYO brand variant name changes from (July 2014 - November 2017)

|                                                                             |                    | N  |                                           | Additions/substitutions |
|-----------------------------------------------------------------------------|--------------------|----|-------------------------------------------|-------------------------|
| <b>Legally required actions</b>                                             |                    |    |                                           |                         |
| <i>Taste removed</i>                                                        | <i>Replacement</i> |    |                                           |                         |
| Menthol                                                                     | Colour             | 20 | green                                     |                         |
|                                                                             | No replacement     | 2  |                                           |                         |
| Smooth                                                                      | Colour + adjective | 12 | bright blue/yellow, sky blue              |                         |
|                                                                             | Adjective          | 5  | bright, sky                               |                         |
|                                                                             | Colour             | 3  | blue, yellow                              |                         |
|                                                                             | Other Substitution | 1  | fine                                      |                         |
| other taste ('fresh burst', 'fresh taste', 'ice capsule', 'subtle flavour') | Other Substitution | 3  | crushball, dual                           |                         |
|                                                                             | No replacement     | 1  |                                           |                         |
| <b>Environmental advantages removed</b>                                     |                    |    |                                           |                         |
| 'Natural'                                                                   | Other Substitution | 2  | blue, king size                           |                         |
|                                                                             | No replacement     | 3  |                                           |                         |
| Total                                                                       |                    | 52 |                                           |                         |
| <b>Discretionary actions only</b>                                           |                    |    |                                           |                         |
| colour+adjective added                                                      |                    | 9  | original silver/blue/black, real blue/red |                         |
| adjective added                                                             |                    | 8  | bright, real, legendary                   |                         |
| colour added                                                                |                    | 7  | blue, red, black                          |                         |
| 'original' added                                                            |                    | 6  |                                           |                         |



|                                         |           |                                                                                                                                              |
|-----------------------------------------|-----------|----------------------------------------------------------------------------------------------------------------------------------------------|
| size (king size, superkings)<br>removed | 6         |                                                                                                                                              |
| Mixed & miscellaneous                   | 35        | Mixed: e.g. colour added and size removed<br><br>Miscellaneous: e.g. location added or removed e.g Rothman's of London became Rothman's Blue |
| <b>Total</b>                            | <b>71</b> |                                                                                                                                              |
| <b>Grand total</b>                      | <b>12</b> |                                                                                                                                              |
|                                         | <b>3</b>  |                                                                                                                                              |

In October 2016, five months into the sell-through period and before IMT had made any of its legally required name changes to its products, the company outlined its brand renaming strategy in an advertorial in the retail press(20). The advertorial explained that all products traditionally presented as full flavour would become 'real' or 'original' and be associated primarily with the colour red. Those previously denoted as 'smooth' would change to 'bright' and become associated with the colour blue. Menthol would become green and capsule would become Crushball (Table S2: Strategy 2). IMT also provided retailers with materials to help explain changes to consumers(20). Some companies also advertised name changes directly to consumers through pack inserts (eg. BAT's Rothmans of London included a pack insert to warn its smokers that it was to become Rothman's Blue).

### **Strategy 3. Focus on lower price segments**

During the study period, 68% of new variants recorded by Nielsen were FM and 32% RYO. Given that in July 2014, 81% variants on the UK market were FM and 19% were RYO (Table 5), more new RYO variants were introduced than expected ( $p=.018$ ).

1  
2  
3  
4  
5  
6  
7  
8 Half (50%) of all new variants were introduced in the FM value and subvalue price  
9  
10 segments, 22% FM premium and midprice, 15% RYO premium and midprice and 13% RYO  
11  
12 value. However, prior to the decision to implement standardised packaging (July 2014), the  
13  
14 distribution of the market was 50% FM premium and midprice, 35% FM value and subvalue,  
15  
16 8% RYO premium and midprice and 7% RYO value. Thus new variants were under-  
17  
18 represented among FM premium and midprice brands ( $p=.001$ ).  
19  
20

21  
22 Similarly, compared with July 2014, name changes in the study period were overrepresented  
23  
24 among FM value and subvalue ( $p=.048$ ) and under-represented among FM premium and  
25  
26 midprice brands ( $p=.002$ ).  
27  
28  
29  
30  
31  
32  
33  
34

35 Companies introduced more menthol and flavoured capsule variants to the lower price  
36  
37 segments which traditionally offered fewer of these products compared to premium and  
38  
39 midprice segments. Since July 2014, 13 menthol or flavoured capsule variants were  
40  
41 introduced to the value and subvalue price segments compared to just two new brand  
42  
43 variants in the premium and midprice range (Table S4). Overall, the number of brand  
44  
45 families and brand variants declined. Tobacco companies reported concentrating on fewer  
46  
47 brand families so that they could improve the “quality of growth” and “cut the level of  
48  
49 complexity and cost in the business.”(21)  
50  
51  
52  
53  
54  
55  
56  
57  
58  
59  
60

Table 5 Nielsen data. Price segmentation of new variants and variant names changes between July 2014 and November 2017 compared to July 2014 baseline.

| Tobacco Type           | Baseline distribution of variants (July 2014) |     | Name changes (July 2014 – November 2017) |     |      | New variants (July 2014 – November 2017) |     |      |
|------------------------|-----------------------------------------------|-----|------------------------------------------|-----|------|------------------------------------------|-----|------|
|                        | N                                             | %   | N                                        | %   | P*   | N                                        | %   | P*   |
|                        | FM                                            | 225 | 81%                                      | 5   | 79%  | .527                                     | 48  | 68%  |
| RYO                    | 54                                            | 19% | 35                                       | 21% |      | 23                                       | 32% |      |
| <b>Price segment</b>   |                                               |     |                                          |     |      |                                          |     |      |
| FM premium & midprice  | 103                                           | 50% | 48                                       | 33% | .002 | 10                                       | 22% | .001 |
| FM value & sub value   | 72                                            | 35% | 66                                       | 45% | .048 | 23                                       | 50% | .054 |
| RYO premium & midprice |                                               |     |                                          |     | .097 |                                          |     | .164 |
|                        | 17                                            | 8%  | 20                                       | 14% |      | 7                                        | 15% | #    |
| RYO value              |                                               |     |                                          |     | .735 |                                          |     | .602 |
|                        | 15                                            | 7%  | 12                                       | 8%  |      | 6                                        | 13% | #    |

\*Chi square comparing with July 2014 distribution

#Fishers exact test comparing with July 2014 distribution

Nearly two-thirds of the advertisements captured from the retail press, 124/195 (64%) advertised value or subvalue brands. Similarly, for new products, the majority of advertisements (30/38; 79%) were for value or subvalue brands. Only one advert was a new premium offering.

The commercial literature found tobacco companies innovating within lower price segments, introducing packs with fewer cigarettes prior to the sell-through (22-24) followed by a price-war in the lower priced segments with some manufacturers reportedly selling at a loss to gain market share(16). By the end of 2017 tobacco companies stated that smokers expected better quality products in lower price segments after standardised packaging and Minimum Excise Tax (MET) legislation raised the price of the cheaper brands and so 'premium

1  
2  
3 features' in lower priced cigarettes appeared (Table S2: Strategy 3)(23, 25). For example, a  
4  
5  
6 redesign to Chesterfield (subvalue) was advertised to retailers in December 2017, citing a  
7  
8 new 'firm' filter and, as with premium brand Marlboro, a new bevelled edge box(24, 26).  
9  
10  
11  
12  
13  
14  
15  
16  
17  
18  
19  
20  
21  
22  
23  
24  
25  
26  
27  
28  
29  
30  
31  
32  
33  
34  
35  
36  
37  
38  
39  
40  
41  
42  
43  
44  
45  
46  
47  
48  
49  
50  
51  
52  
53  
54  
55  
56  
57  
58  
59  
60

For peer review only

#### **Strategy 4. Innovating exemptions to the legislation**

The commercial literature and pack purchase study suggested that tobacco companies continued to innovate and market their tobacco products by focusing on exemptions to the legislation (Table S2: Strategy 4).

##### ***Pack modifications that endured post-legislation***

During the sell-through, the pack purchase and commercial literature review revealed that FM Marlboro 10s and RYO *Amber Leaf*, *Golden Virginia* and *Cutter's Choice* were sold in reusable tins, arguably allowing consumers to decant cigarettes bought post-legislation into branded tins. Selling RYO in tins is not novel but cigarettes have rarely been sold in tins previously.

Pack purchases found that best-selling premium brand family *Marlboro* changed significantly in July 2016 (two months into sell-through), with the introduction of bevelled pack edges and a *pro-seal* closing mechanism (Figure 3). Both features fundamentally changed the tactile nature of the pack which endured after full-implementation in May 2017 (Supplementary Video 1). To be compliant with the legislation, these packs must have been printed prior to May 2016.

##### ***Extra Sticks***

Given that there is no restriction on the maximum number of sticks per pack, packs with more than 20 continued post-legislation. During the sell-through (May 2016 - May 2017) sales of packs with 23 and 24 sticks increased from 7 to 18 million sticks. Sales peaked at 25 million sticks in August 2017 and declined to 21 million sticks in November 2017.

### **Branded Outers**

The retail literature and in person observations revealed that multipack wholesale outers for FM and RYO are branded (Figure 4). Outers can be seen by customers during tobacco product gantry restocking. Advertisements in the retail press showed images of branded tobacco products including branded outers post-legislation.

### **RYO accessories**

Increased innovation was observed among RYO accessories post legislation with retail press articles in November 2017 and February 2018 referring to “‘ultra slim’ and slim filters and papers, biodegradable filters, and menthol tips” (Table S2; Strategy 4.4) (25, 27).

### **Cigars**

Cigars, which can be sold in branded packs, single sticks without pictorial health warnings, at a relatively low price and with good profit margin, were identified as an opportunity for growth (19, 24, 28-30). Euromonitor’s models suggested growth in cigars and cigarillos sales volumes (390 to 494 million units) and value (£292 to £348 million) from 2015 to 18 (Table S5). Towards the end of 2017, JTI and cigar company Ritmeester were holding social events to build relationships with retailers (Table S2; Strategy 4.5) (24).

### **Pipe Tobacco**

The retail literature revealed that one small tobacco manufacturer, *Gawith Hoggarth*, deliberately marketed pipe tobacco as RYO to circumvent the minimum pack size restrictions on RYO (Table S2; Strategy 4.6)(31).

## **Discussion**

1  
2  
3 UK Standardised Packaging legislation and the EU TPD placed restrictions on tobacco  
4  
5 packaging and marketing in the UK. Overall, although compliance with the restrictions  
6  
7 (removal of branding, small pack sizes and non-compliant names) was not 100% one month  
8  
9 after full implementation, the majority of non-compliance could be explained by less popular  
10  
11 tobacco products that were not widely circulated. However, clarity is needed about the  
12  
13 legality of isolated incidents such as the compliance of the *Marlboro* resealable pack and  
14  
15 Gawith Hoggath's marketing of its *Kendal* pipe tobacco as RYO (Video 1).  
16  
17  
18  
19  
20

21 Technical compliance aside, this paper identified four key strategies use by tobacco  
22  
23 companies to circumvent the legislation.  
24  
25

26 Firstly, the retail literature suggests that tobacco companies used the 12-month sell-through  
27  
28 to their advantage, keeping branded stock on the market as long as possible, and using the  
29  
30 time to communicate name changes and new brand variants to retailers and customers.  
31  
32

33 Ahead of the sell-through companies increased production of branded packs, introduced  
34  
35 smaller pack sizes to enable more affordable offerings, and encouraged retailers to buy  
36  
37 large quantities of branded stock at reduced prices. Other countries had a shorter sell-  
38  
39 through period with three-months for Australia and New Zealand (32, 33) and seven months  
40  
41 for France (34). Governments considering the policy in other countries should therefore  
42  
43 consider mandating a short sell-through period.  
44  
45  
46  
47  
48  
49

50 Second, although compliant with legally required name removals, tobacco companies  
51  
52 implemented a standard name change formula that maintained the brand identity and  
53  
54 differentiation of the three broad flavour categories (1) full flavour; (2) smooth; (3)  
55  
56 menthol(20). In 2002 terms such as 'mild' and 'light' were prohibited to curb misperceptions  
57  
58 of relative harm. However, the continuation of the colours of the previous packs such as the  
59  
60

1  
2  
3 gold and white pack for *Marlboro 'lights'* and the introduction of terms such as smooth for  
4  
5 other brands sustained these misperceptions(35, 36). In line with the power of colour in  
6  
7 brand identity,(36-38) this study shows that tobacco companies changed '*full-flavour*'  
8  
9 variants to *red, original, or real; menthol* variants to *green*, and *smooth variants* to *bright* and  
10  
11 *blue (or yellow* for RYO). As in 2002, the current restrictions on tobacco product name were  
12  
13 designed disrupt misperceptions of relative harms based on flavour descriptions. However,  
14  
15 by maintaining the broad flavour categories such misperceptions are likely to endure.  
16  
17 Additionally, cigarette packs with filter descriptions such as 'advanced' and 'firm' filter are  
18  
19 perceived as less harmful by existing smokers and therefore perpetuate the perceptions that  
20  
21 some tobacco brand variants are less harmful than others(39). Given that companies  
22  
23 continue to innovate their product names and descriptions it may be considered necessary  
24  
25 to follow the example of Uruguay where only one brand variant is permitted per brand and  
26  
27 no new brands are allowed(40).  
28  
29  
30  
31  
32  
33  
34

35 Third, Nielsen data and the commercial literature revealed that tobacco companies were  
36  
37 fighting fervently for market share in the cheaper price segments with a price war pre  
38  
39 implementation. In the lower price segments, tobacco companies implemented more name  
40  
41 changes, introduced more new brand variants(including menthol and flavour capsules) and  
42  
43 more RYO variants and placed more advertisements for lower priced products than they did  
44  
45 for premium and midprice products. Other work suggests that RYO is a lower cost  
46  
47 alternative to smokers who may otherwise quit and so this may explain the introduction of  
48  
49 more RYO offerings in lower price segments (41-43). Similarly, menthol and particularly  
50  
51 flavour-capsule variants appeal more to non-smokers and non-daily smokers compared to  
52  
53 smokers and may therefore recruit non-smokers and increase overall smoking prevalence  
54  
55  
56  
57  
58  
59 (8). Flavoured cigarettes including capsule flavourings will be outlawed in the EU by May  
60



1  
2  
3 2020. With the UK set to leave the EU in 2019, the tobacco industry may utilise this  
4  
5 opportunity to try and roll back tobacco control regulations made under the EU TPD.  
6  
7

8  
9 Our fourth finding that tobacco companies are innovating tobacco products, features and  
10 accessories not covered by the UK or EU legislation for growth provides may provide a  
11 rationale for expanding the legislation to include products such as RYO filters and papers,  
12 standardised packaging for cigars, cigarillos, pipe tobacco, wholesale outer wraps,  
13 standardised pack edges, maximum pack sizes and prohibitions for innovations to pack  
14 seals. Tobacco companies, such as Imperial Tobacco in the UK have recently introduced a  
15 whole series of flavour capsule variants to their *Rizla* filter tip product offerings for RYO  
16 tobacco.  
17  
18  
19  
20  
21  
22  
23  
24  
25  
26  
27

28  
29 The strength of this paper lies both in the detail and depth of each analysis including our  
30 systematic analysis of retail press advertisements (n=195) and commercial literature articles  
31 and reports (n= 396) alongside pack purchases of the top selling brands and detailed sales  
32 information from Nielsen. Using multiple data sources enabled findings to be verified by  
33 more than one source and enabled a greater understanding of the tobacco industry's  
34 motives for any changes made to their products and packaging. In addition to the evidence  
35 presented by others [1, 13, 14], by following these data sources up to seven months post-  
36 legislation we were able to observe tobacco companies increased focus on innovations to  
37 exemptions to the legislation that offered opportunities for growth e.g. RYO filters and  
38 accessories and cigars.  
39  
40  
41  
42  
43  
44  
45  
46  
47  
48  
49  
50  
51

52  
53 Nevertheless, despite evidence from an IMT whistleblower (44) and PMI's own words (45),  
54 our data did not reveal price mark stickers on tobacco products. This is likely to be because  
55 we bought our eight brands from a large supermarket and not a convenience store and  
56  
57  
58  
59  
60

1  
2  
3 because this industry strategy was not highlighted in the retail literature due to the  
4  
5  
6 questionable legality of this strategy(46).  
7  
8

9 Resources prevented us from acquiring Nielsen data on cigars or pipe tobacco and from  
10  
11 purchasing more than one brand per price segment in the pack purchasing study element.  
12  
13 However, the retail literature alerted us that cigars and other products were targeted as  
14  
15 growth opportunities and, although not able to fully capture the sensory nature of brands, our  
16  
17 analysis of the advertisements ensured that we saw many, if not all, innovations being  
18  
19 promoted to retailers.  
20  
21  
22

23  
24 Nielsen data do not record whether RYO products are sold in standardised packs. We  
25  
26 assumed that 30g packs were always in standardised packs and that larger packs would  
27  
28 switch to standardised packs at the same time. It is possible that this did not occur.  
29  
30 However the temporal patterns of name changes and pack sizes in the Nielsen data were  
31  
32 similar for FM and RYO and it is therefore reasonable to assume that branding was removed  
33  
34 at the same time. Nielsen model prices and volumes for the UK based on a census of the  
35  
36 major supermarket sales and a rolling sample of convenience stores. Although, we do not  
37  
38 know the extent to which Nielsen variant name changes lag behind and even reflect those  
39  
40 printed on packs in retailers, the main name change patterns found in the Nielsen data were  
41  
42 similar to those found in a UK convenience store study(47) and two evaluations of the  
43  
44 introduction of standardised packaging in Australia(4, 5).  
45  
46  
47  
48  
49

50  
51 Given that the tobacco industry is attempting to circumvent standardised packaging  
52  
53 legislation, other countries considering the policy should consider how to make regulations  
54  
55 as comprehensive as possible to prevent the exploitation of continued marketing  
56  
57 opportunities. In summary, the evidence in this paper suggests a number of possible policy  
58  
59  
60

1  
2  
3 options, namely that long sell-through periods should be avoided and that restricting tobacco  
4  
5 products to one brand variant per brand may be the only comprehensive way to prevent  
6  
7 misperceptions of harm and an that extending regulations to include other tobacco products,  
8  
9 features and accessories should be considered.  
10  
11  
12  
13  
14  
15  
16  
17  
18  
19  
20  
21  
22  
23  
24  
25  
26  
27  
28  
29  
30  
31  
32  
33  
34  
35  
36  
37  
38  
39  
40  
41  
42  
43  
44  
45  
46  
47  
48  
49  
50  
51  
52  
53  
54  
55  
56  
57  
58  
59  
60

For peer review only

1  
2  
3 **Author contributions:** AG designed the study with contributions from KER and RH. KER led  
4 the writing of the paper and designed, conducted and analysed the pack purchase element  
5 of the study. RH analysed the Nielsen data in addition to downloading and analysing the  
6 commercial literature. KL collated the retail literature advertisements, involving visits to the  
7 British Library and analysed the data. All authors read and approved the manuscript.  
8  
9  
10  
11  
12  
13  
14  
15  
16  
17  
18

19 **Acknowledgements:** The authors would like to thank Dr Rob Branston who read and  
20 commented upon a near final draft and Ilhan Marsal who helped with early preparation of the  
21 advertisements and pack purchased data. We would also like to acknowledge Nielsen (UK)  
22 and Public Health England for provision of the sales data.  
23  
24  
25  
26  
27  
28  
29  
30  
31  
32

33 **Data statement:**

- 34 1. The Nielsen dataset: cannot be accessed by others as it is paid for data and we do  
35 not have permissions to republish these.  
36  
37
- 38 2. Pack purchasing: qualitative observational data are available from the University of  
39 Bath data archive  
40  
41
- 42 3. Retail press advertisements: the coded dataset is available from the University of  
43 Bath data archive  
44  
45
- 46 4. Commercial literature: full articles were analysed in NVivo software. As the majority  
47 of documents came from paid for publications we are not permitted to publish these  
48 articles. Tobacco company annual reports are publicly available on tobacco company  
49 websites.  
50  
51  
52  
53  
54  
55  
56  
57  
58  
59  
60

1  
2  
3  
4  
5  
6  
7  
8  
9  
10  
11  
12  
13  
14  
15  
16  
17  
18  
19  
20  
21  
22  
23  
24  
25  
26  
27  
28  
29  
30  
31  
32  
33  
34  
35  
36  
37  
38  
39  
40  
41  
42  
43  
44  
45  
46  
47  
48  
49  
50  
51  
52  
53  
54  
55  
56  
57  
58  
59  
60

For peer review only

## References

1. The standardised packaging of tobacco products regulations 2015, No.829, (19 March 2015). Available from: [https://www.legislation.gov.uk/uksi/2015/829/pdfs/uksi\\_20150829\\_en.pdf](https://www.legislation.gov.uk/uksi/2015/829/pdfs/uksi_20150829_en.pdf).
2. Department of Health. Tobacco Packaging Guidance: Guidance for retailers, manufacturers and distributors of tobacco products, enforcement agencies and the public on changes to tobacco packaging from 20 May 2016 2016 [updated May 2017, cited 8 January 2018]. Available from: [https://www.gov.uk/government/uploads/system/uploads/attachment\\_data/file/596139/Tobacco\\_Packaging\\_Guidance.pdf](https://www.gov.uk/government/uploads/system/uploads/attachment_data/file/596139/Tobacco_Packaging_Guidance.pdf).
3. Directive 2014/40/EU of the European Parliament and of the Council of 3 April 2014, (2014). Available from: [http://eur-lex.europa.eu/legal-content/EN/TXT/PDF/?uri=OJ:JOL\\_2014\\_127\\_R\\_0001&from=EN](http://eur-lex.europa.eu/legal-content/EN/TXT/PDF/?uri=OJ:JOL_2014_127_R_0001&from=EN).
4. Scollo M, Occleston J, Bayly M, et al. Tobacco product developments coinciding with the implementation of plain packaging in Australia. *Tobacco Control*. 2014;24:e116-e22.
5. Scollo M, Bayly M, White S, et al. Tobacco product developments in the Australian market in the 4 years following plain packaging. *Tobacco Control*. 2018;27:580-4.
6. Scollo M, Zacher M, Coomber K, et al. Changes in use of types of tobacco products by pack sizes and price segments, prices paid and consumption following the introduction of plain packaging in Australia. *Tobacco Control*. 2015;24(Suppl 2):ii66-ii75.
7. Haggart K, Hoek J, Blank M-L. Flavour capsule variants' performance in a "dark market": Implications for standardised packaging. *Nicotine & Tobacco Research*. 2018;158.
8. Hoek J, Gendall P, Eckert C, et al. Young adult susceptible non-smokers' and smokers' responses to capsule cigarettes. *Tobacco Control*. 2018;0:1-8.
9. Moodie C, Ford A, Dobbie F, et al. The Power of Product Innovation: Smokers' Perceptions of Capsule Cigarettes. *Nicotine & Tobacco Research*. 2017;20(9):1157-60.
10. Moodie C, Hoek J, Scheffels J, et al. Plain packaging: legislative differences in Australia, France, the UK, New Zealand and Norway, and options for strengthening regulations. *Tob Control*. 2018.
11. Hiscock R, Branston JR, McNeill A, et al. Tobacco industry strategies undermine government tax policy: evidence from commercial data. *Tobacco Control*. 2017;27:488-97.
12. Moodie C, Angus K, Mitchell D, et al. How tobacco companies in the UK prepared for and responded to standardised packaging of cigarettes and rolling tobacco. *Tobacco Control* 2018.
13. Breton MO, Britton J, Huang Y, et al. Cigarette brand diversity and price changes during the implementation of plain packaging in the United Kingdom. *Addiction*. 2018.
14. Branston JR, McNeill A, Gilmore AB, et al. Keeping smoking affordable in higher tax environments via smoking thinner roll-your-own cigarettes: Findings from the International Tobacco Control Four Country Survey 2006–15. *Drug and Alcohol Dependence*. 2018;193:110-16.
15. Explained: Retailer's questions about EUTPD II: Retail Newsagent; 10 May 2016 [18 April 2018]. Available from: <https://www.betterretailing.com/questions-about-eutpd2>.
16. Value brands price war hits retail profits: BetterRetailing; 17 February 2017 [18 April 2018]. Available from: <https://www.betterretailing.com/value-brands-price-war-hits-retail-profits>.
17. Cash incentives and price cuts drive tobacco sales: Retail Newsagent; 26 May 2016 [20 April 2018]. Available from: <https://www.betterretailing.com/tobacco-cashandcuts>.
18. Samrai G. Wholesalers: tobacco suppliers will help retailers with branded stock post-EUTPD II: Retail Newsagent; 2 March 2017 [18 April 2018]. Available from: <https://www.betterretailing.com/tobacco-suppliers-branded-stock>.
19. Dillon C. Three things you can learn from Ritmeester's cigar seminars: Retail Express; 17 September 2017 [24 April 2018]. Available from: <https://www.betterretailing.com/ritmeesters-seminar>.
20. Imperial Tobacco. Partnering for Success through EUTPD II and standardised packaging: Part 4. New pack descriptors under EUTPD II. Retail Newsagent. 28 October 2016:20-1.

- 1  
2  
3 21. Imperial Brands. Annual report and accounts 2017: Investing for growth 2017 [29 May  
4 2019]. Available from: [https://www.imperialbrandsplc.com/content/dam/imperial-  
7 pdfs/Annual\\_Report\\_2017\\_Final\\_PDF\\_Web\\_Ready\\_171207.pdf](https://www.imperialbrandsplc.com/content/dam/imperial-<br/>5 brands/corporate/investors/annual-report-and-accounts/online-annual-report-<br/>6 pdfs/Annual_Report_2017_Final_PDF_Web_Ready_171207.pdf)
- 8 22. O'Donnell T. The fat lady sings: tobacco category report 2016: The Grocer; 11 February 2016  
9 [19 April 2018]. Available from: [https://mweb02.thegrocer.co.uk/reports/category-reports/the-fat-  
11 lady-sings-tobacco-category-report-2016/531520.article](https://mweb02.thegrocer.co.uk/reports/category-reports/the-fat-<br/>10 lady-sings-tobacco-category-report-2016/531520.article).
- 12 23. Selwood D. Pall Mall cigarettes get taste plus filter in range upgrade 18 April 2016 [20 April  
13 2018]. Available from: [https://www.thegrocer.co.uk/buying-and-supplying/marketing/pall-mall-cigs-  
15 get-taste-plus-filter-in-range-upgrade/534748.article](https://www.thegrocer.co.uk/buying-and-supplying/marketing/pall-mall-cigs-<br/>14 get-taste-plus-filter-in-range-upgrade/534748.article).
- 16 24. Yau A. The latest developments from the biggest tobacco brands: Retail Newsagent; 5 April  
17 2018 [20 April 2018]. Available from: [https://www.betterretailing.com/developments-from-the-  
19 biggest-tobacco-brands](https://www.betterretailing.com/developments-from-the-<br/>18 biggest-tobacco-brands).
- 20 25. Pendleton R. A tightening stranglehold: tobacco category report 2018: The Grocer; 9  
21 February 2018 [19 April 2018]. Available from: [https://www.thegrocer.co.uk/buying-and-  
24 supplying/categories/tobacco/an-ever-tightening-stranglehold-tobacco-category-report-  
25 2018/563080.article](https://www.thegrocer.co.uk/buying-and-<br/>22 supplying/categories/tobacco/an-ever-tightening-stranglehold-tobacco-category-report-<br/>23 2018/563080.article).
- 26 26. Philip Morris International. Stock up now: Chesterfield with new premium features. Retail  
27 Newsagent. 15 December 2017.
- 28 27. Cronin E. Rizla launches new Natura paper and tips range: Talking Retail; 3 August 2017 [4  
29 April 2018]. Available from: [https://www.talkingretail.com/products-news/tobacco/rizla-launches-  
31 new-natura-paper-tips-range-03-08-2017/](https://www.talkingretail.com/products-news/tobacco/rizla-launches-<br/>30 new-natura-paper-tips-range-03-08-2017/).
- 32 28. Appleby S. New tobacco law, means new opportunity for cigars sales: Retail Express; 6 June  
33 2016 [24 April 2018]. Available from: <https://www.betterretailing.com/cigar-market>.
- 34 29. Dillon C. Ritmeester launches single stick Panatellas: Retail Express; 15 January 2015 [23  
35 April 2018]. Available from: [https://www.betterretailing.com/ritmeester-single-royal-dutch-  
37 panatellas](https://www.betterretailing.com/ritmeester-single-royal-dutch-<br/>36 panatellas).
- 38 30. Lee J. Know the value of the tobacco market to keep sales strong. Retail Express. 22 August  
39 2017.
- 40 31. Gockelen-Kozlowski T. Tobacco firms adapt to deal with latest EUTPD laws: Retail  
41 Newsagent; 25 May 2017 [20 April 2018]. Available from: [https://www.betterretailing.com/tobacco-  
43 legislation](https://www.betterretailing.com/tobacco-<br/>42 legislation).
- 44 32. Ministry of Health (New Zealand). Tobacco standardised packaging 2017 [updated 13th June  
45 2017, cited 16th March 2018]. Available from: [https://www.health.govt.nz/our-work/preventative-  
47 health-wellness/tobacco-control/plain-packaging](https://www.health.govt.nz/our-work/preventative-<br/>46 health-wellness/tobacco-control/plain-packaging).
- 48 33. Scollo M, Lindorff K, Coomber K, et al. Standardised packaging and new enlarged graphic  
49 health warnings for tobacco products in Australia—legislative requirements and implementation of  
50 the Tobacco Plain Packaging Act 2011 and the Competition and Consumer (Tobacco) Information  
51 Standard. *Tobacco Control*. 2015;24(Suppl 2):ii9.
- 52 34. Tobacco Labelling Resource Centre. France 2013 [cited 2018 16th March]. Available from:  
53 <http://www.tobaccolabels.ca/countries/france/>.
- 54 35. Mutti S, Hammond D, Borland R, et al. Beyond light and mild: cigarette brand descriptors  
55 and perceptions of risk in the International Tobacco Control (ITC) Four Country Survey. *Addiction*.  
56 2011;106(6):1166-75.
- 57 36. Bansal-Travers M, O'Connor RJ, Fix BV, et al. What do cigarette pack colors communicate to  
58 smokers in the U.S.? *American Journal of Preventive Medicine*. 2011;40(6):683-89.
- 59 37. Hoek J, Gendall P, Eckert C, et al. Effects of brand variants on smokers' choice behaviours  
60 and risk perceptions. *Tobacco Control*. 2016;25(2):160-5.
38. Greenland SJ. Cigarette brand variant portfolio strategy and the use of colour in a darkening  
market. *Tobacco Control*. 2015;24:e65-e71.

- 1  
2  
3 39. Borland R, Savvas S. The effects of variant descriptors on the potential effectiveness of plain  
4 packaging. *Tobacco Control*. 2014;23:58-63.  
5 40. Hoek J, Gendall P. Policy options for extending standardized tobacco packaging. *Bulletin of*  
6 *the World Health Organization*. 2017;95(10):726.  
7 41. Bayly M, Scollo MM, Wakefield MA. Who uses rollies? Trends in product offerings, price and  
8 use of roll-your-own tobacco in Australia. *Tobacco Control*. 2018:1-8.  
9 42. Curti D, Shang C, Ridgeway W, et al. The use of legal, illegal and roll-your-own cigarettes to  
10 increasing tobacco excise taxes and comprehensive tobacco control policies: findings from the ITC  
11 Uruguay Survey. *Tobacco Control*. 2015;24:iii17-iii24.  
12 43. Hoek J, Ferguson S, Court E, et al. Qualitative exploration of young adult RYO smokers'  
13 practices. *Tobacco Control*. 2017;26(5):563-8.  
14 44. Doward J. How tobacco firms flout UK law on plain packaging: The Observer; 9 April 2017 [12  
15 November 2018]. Available from: [https://www.theguardian.com/society/2017/apr/09/tobacco-](https://www.theguardian.com/society/2017/apr/09/tobacco-companies-flout-law-plain-packaging)  
16 [companies-flout-law-plain-packaging](https://www.theguardian.com/society/2017/apr/09/tobacco-companies-flout-law-plain-packaging).  
17 45. Nixon P. Re: Price marking on packs of Work. Letter from Peter Nixon, Philip Morris  
18 International to Deborah Arnott, Action for Smoking and Health. [Personal Communication]. 15 May  
19 2017.  
20 46. Leigh Day. Re: Price marking on tobacco packaging of Work. Legal opinion of Leigh Day to  
21 Action for Smoking and Health. [Personal Communication]. 3 March 2017.  
22 47. Critchlow N, Stead M, Moodie C, et al. Introduction of standardized tobacco packaging  
23 during a 12-month transition period: findings from small retailers in the United Kingdom. *Nicotine &*  
24 *Tobacco Research*. 2018.  
25  
26  
27  
28  
29  
30  
31  
32  
33

## Figure captions

34 Figure 1. Timeline of data collection by data source

35  
36 Figure 2. Proportion of (a) FM sticks and (b) RYO\* (by weight) sold in standardised packaging over  
37 time

38  
39 Figure 3. The evolution of Marlboro Gold packaging from a straight edge pack to a branded bevelled  
40 edge pack with a new internal packet with pro-seal sealing mechanism, to standardised packaging  
41 maintaining these innovations

42  
43 Figure 4. Branded outers post May 2016 (full-implementation)  
44  
45  
46  
47  
48  
49  
50  
51  
52  
53  
54  
55  
56  
57  
58  
59  
60



1  
2  
3  
4  
5  
6  
7  
8  
9  
10  
11  
12  
13  
14  
15  
16  
17  
18  
19  
20  
21  
22  
23  
24  
25  
26  
27  
28  
29  
30  
31  
32  
33  
34  
35  
36  
37  
38  
39  
40  
41  
42  
43  
44  
45  
46  
47  
48  
49  
50  
51  
52  
53  
54  
55  
56  
57  
58  
59  
60

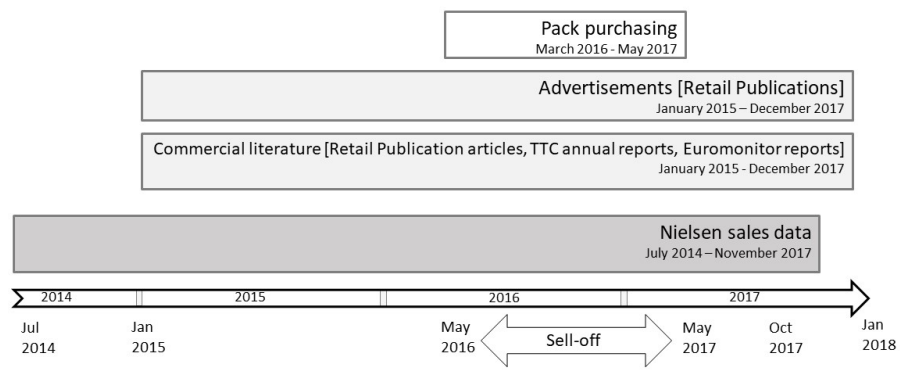

Figure 1. Timeline of data collection by data source  
338x190mm (96 x 96 DPI)

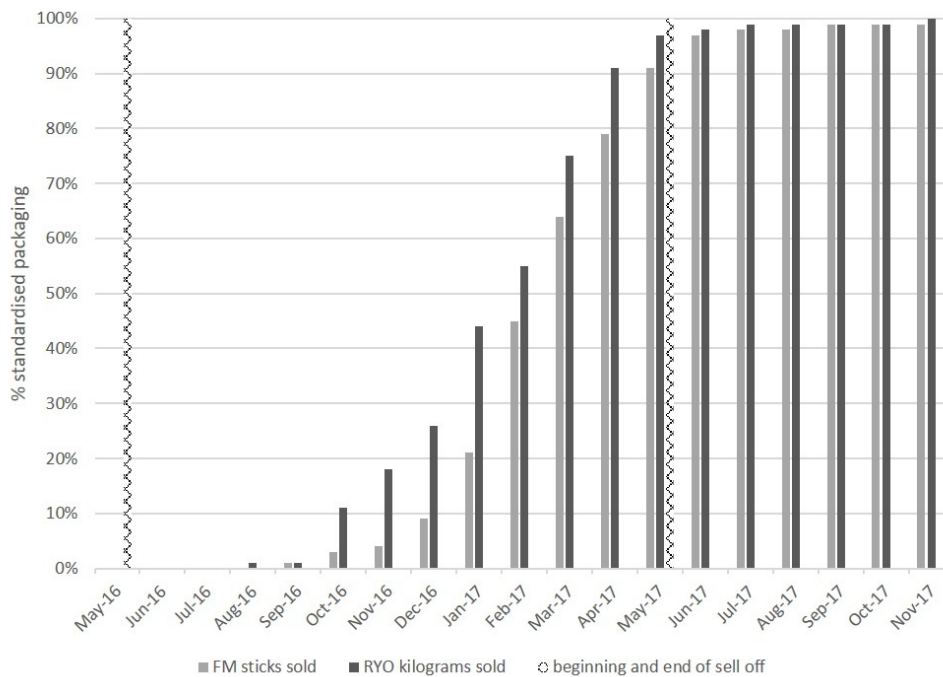

Figure 2. Proportion of (a) FM sticks and (b) RYO\* (by weight) sold in standardised packaging over time  
85x60mm (300 x 300 DPI)

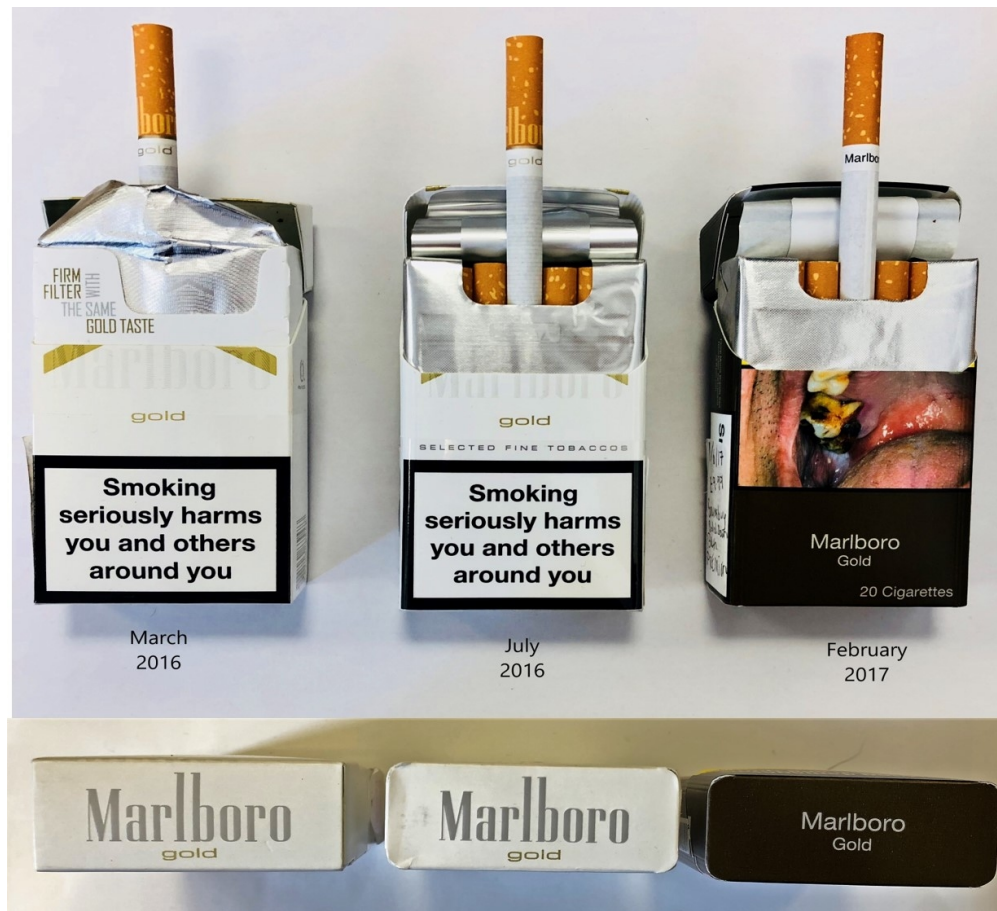

Figure 3. The evolution of Marlboro Gold packaging from a straight edge pack to a branded bevelled edge pack with a new internal packet with pro-seal sealing mechanism, to standardised packaging maintaining these innovations

103x94mm (300 x 300 DPI)

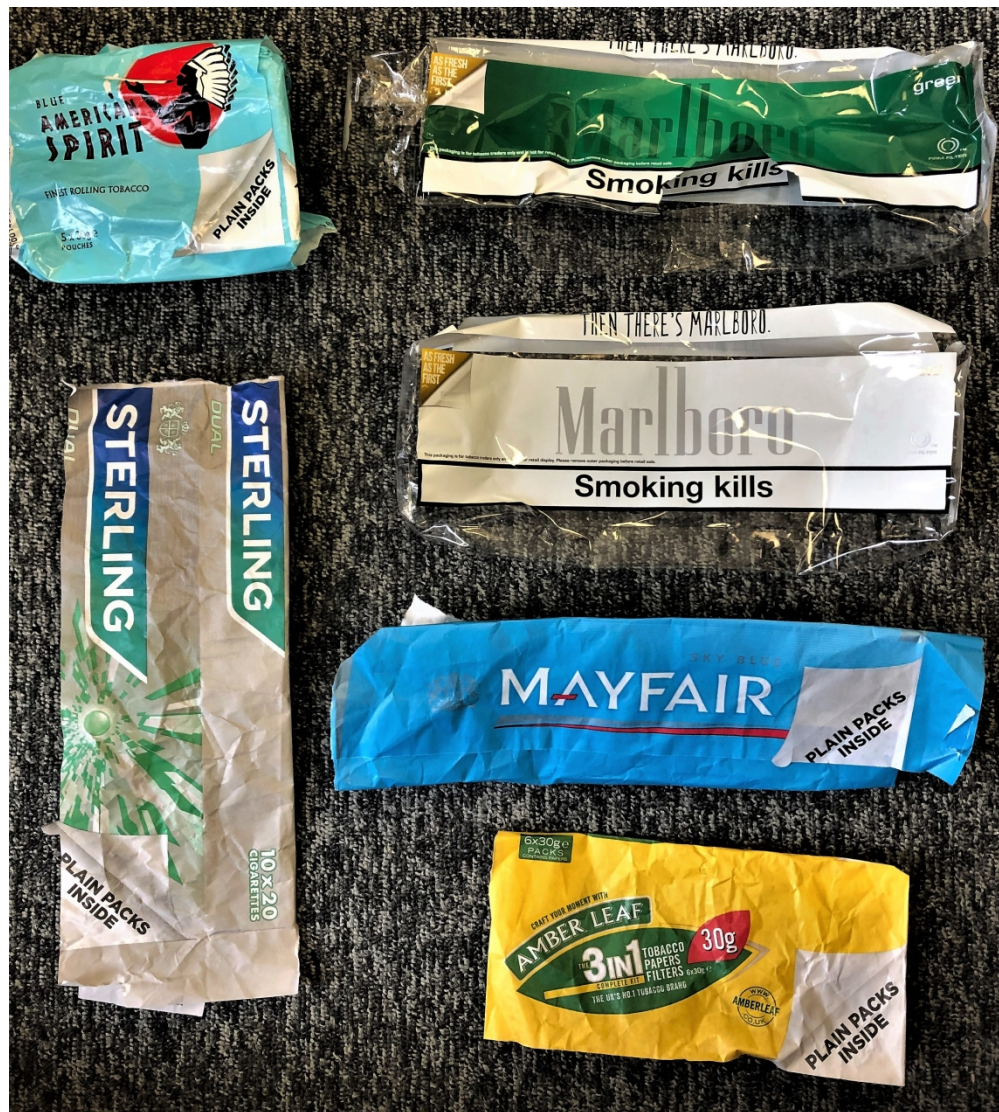

Figure 4. Branded outers post May 2016 (full-implementation)

256x283mm (300 x 300 DPI)

Supplementary file material for “Assessing tobacco company adaptation to standardised packaging: identifying circumventions and closing loopholes”

Table S1. Tobacco advert characteristics by price segment (n= 195) <sup>1</sup>

| Characteristics of advert <sup>2</sup> | Subvalue <sup>3</sup> | FM & RYO |          |         | Cigars/ cigarillos | Pipe |
|----------------------------------------|-----------------------|----------|----------|---------|--------------------|------|
|                                        |                       | Value    | Midprice | Premium |                    |      |
| <u>Type of tobacco</u>                 |                       |          |          |         |                    |      |
| FM                                     | 22                    | 78       | 42       | 21      |                    |      |
| RYO                                    | n/a                   | 24       | 13       | 16      |                    |      |
| <u>Characteristics promoted</u>        |                       |          |          |         |                    |      |
| New brand variant <sup>4</sup>         | 7                     | 23       | 5        | 1       | 0                  | 0    |
| New packaging                          | 4                     | 25       | 17       | 16      | 0                  | 0    |
| Limited Edition                        | 0                     | 4        | 5        | 5       | 2                  | 0    |
| Filter                                 | 0                     | 16       | 0        | 6       | 0                  | 0    |
| Price                                  | 19                    | 68       | 14       | 4       | 2                  | 1    |
| Retailer profit                        | 1                     | 42       | 21       | 5       | 6                  | 1    |

<sup>1</sup> Totals do not add up to 195 adverts as many adverts promoted more than one type of tobacco, more than one price segment and more than one characteristic in the same advert.

<sup>2</sup> Does not include cigars/cigarillos or pipe tobacco or as we have no data on price segment for these products.

<sup>3</sup> FM only. This price segment does not exist for RYO.

<sup>4</sup> There were 38 adverts in total for a new brand variant but 2 of the adverts could not be categorised by price segment.

Table S2 Industry strategies to circumvent standardised packaging and exploit loopholes implied by commercial literature

| Industry strategy                                                      | Tactic                                                                                | Quote from the commercial literature                                                                                                                                                                                                                                                                                                                                                                                                                                                                                                                                                                                                                                                                                                                                                                                                                                                                                                                                                                                                                                                                                                                                                                                                                                                                                                                                                                                                                                                                                                                                                                                                                                                                                                                                                                                                                                                |
|------------------------------------------------------------------------|---------------------------------------------------------------------------------------|-------------------------------------------------------------------------------------------------------------------------------------------------------------------------------------------------------------------------------------------------------------------------------------------------------------------------------------------------------------------------------------------------------------------------------------------------------------------------------------------------------------------------------------------------------------------------------------------------------------------------------------------------------------------------------------------------------------------------------------------------------------------------------------------------------------------------------------------------------------------------------------------------------------------------------------------------------------------------------------------------------------------------------------------------------------------------------------------------------------------------------------------------------------------------------------------------------------------------------------------------------------------------------------------------------------------------------------------------------------------------------------------------------------------------------------------------------------------------------------------------------------------------------------------------------------------------------------------------------------------------------------------------------------------------------------------------------------------------------------------------------------------------------------------------------------------------------------------------------------------------------------|
| 1. Keep branded packaging on the market throughout the sell-off period | 1.1 Over-producing branded packs before the sell-off                                  | “BAT has had to produce higher stocks prior to the 20 May 2016 manufacturing deadline in order to avoid out of stocks [branded]...The TPD explicitly provides for transitional provisions to allow product manufactured before 20 May 2016 to be sold until 20 May 2017.” Ron Ridderbeek, head of legal and external affairs at British American Tobacco [ <i>Retail Newsagent</i> , 10 May 2016]                                                                                                                                                                                                                                                                                                                                                                                                                                                                                                                                                                                                                                                                                                                                                                                                                                                                                                                                                                                                                                                                                                                                                                                                                                                                                                                                                                                                                                                                                   |
|                                                                        | 1.2 Introducing smaller pack sizes just before the sell-off                           | <p>“Tinkering with pack sizes is a proven wheeze for off setting the impact of tobacco’s growing tax burden on price per pack. JTI has managed to hit the £6.50 price point by launching 17-packs of Sovereign Blue, Sky Blue, Green and Dual. And it’s just in time; from May, pack sizes will be limited to a minimum of 20 cigs.” Japan Tobacco International [<i>The Grocer</i>, 11 February 2016]</p> <p>“Launching next month as the European Union Tobacco Productive Directive comes into force, [Pall Mall’s] redesign - available in 10-pack and 18-pack King Size and Super King 18s - will include the new Taste Plus Filter ... price-marked packs are set to be available at the current [price].” [<i>The Grocer</i>, 18 April 2016]</p>                                                                                                                                                                                                                                                                                                                                                                                                                                                                                                                                                                                                                                                                                                                                                                                                                                                                                                                                                                                                                                                                                                                             |
|                                                                        | 1.3 Providing financial incentives to retailers to sell a particular company’s brands | <p>“Retailers have reported a “massive” increase in cigarette sales as tobacco manufacturers cut prices and offer cash incentives to bolster brands at a time when new plain packaging and smaller pack regulations are set to shake up the industry. ... An independent retailer... said: “I have seen a massive increase in sales. We were also given PoS including shelf wobblers to encourage as many customers as possible to buy the brand. I think this is a really smart way of driving sales and is something that retailers will respond to.” Meanwhile, Imperial Tobacco will knock 10p off the price of four of its biggest tobacco brands - Lambert &amp; Butler, JPS, Players and Gold Leaf - from 1 June, while maintaining cash margins... [A retailer who] has been trialling the new Imperial prices at his store... said: “We sold up to one and a half extra outers a week because of the lower price.” [<i>Retail Newsagent</i>, 26 May 2016]</p> <p>“A value brands price war on cigarettes is hurting retailers’ margins and could lead to stores being “lumbered” with a heap of unwanted, unsaleable stock [with legislation changes;] tobacco suppliers have been dropping the prices of cigarette packs at the value end of the market... some manufacturers... selling value cigarettes at a loss to gain market share... Last runs of branded packs are price-marked lowly and [a retailer] told Retail Express that the actions of suppliers will have grave consequences for unsuspecting retailers.</p> <p>“Situations will arise where retailers are taken in by the low, price-marked RRP and buy in bulk, thinking that consumers will jump at the chance to catch the last batches of cheap packs...Come May 20, they’ll find themselves lumbered with packs of cigarettes they can no longer sell, as supply will outstrip demand...It’s a</p> |

|                                                                          |                                                                 |                                                                                                                                                                                                                                                                                                                                                                                                                                                                                                                                                                                                                                                                                                                                                                                                                                                                                                   |
|--------------------------------------------------------------------------|-----------------------------------------------------------------|---------------------------------------------------------------------------------------------------------------------------------------------------------------------------------------------------------------------------------------------------------------------------------------------------------------------------------------------------------------------------------------------------------------------------------------------------------------------------------------------------------------------------------------------------------------------------------------------------------------------------------------------------------------------------------------------------------------------------------------------------------------------------------------------------------------------------------------------------------------------------------------------------|
|                                                                          |                                                                 | <p>unique situation, but the suppliers have stock they need to get rid of. They're cutting the prices down and loss-leading on them [but]Independent retailers certainly can't afford to loss-lead. "...[Another retailer] said: "... Companies downtrading to push their own agendas does not help us at all. I've even heard that certain wholesalers were offered better percentages to buy in these packs, which would obviously be recouped at the other end."" [Better Retailing, 17 February 2017]</p> <p>""The tobacco suppliers will themselves take back any branded packs after the May cut-off," [wholesaler manager] told RN. "They have teams of people calling on retailers and they are notifying them as to the process. They are saying if they have any branded stock left to call their local rep and they will come in and replace it." [Retail Newsagent, 2 March 2017]</p> |
| <p>2. Maintain brand differentiation through systematic name changes</p> |                                                                 | <p>"We recognise that consumers use brand and colour when asking for their pack of cigarettes." Therefore, generally, those products traditionally presented as 'full flavour' would have 'real' or 'original' added to their names and be denoted predominantly by the colour 'red'. All brand variants with the flavour descriptor 'smooth' would change to 'bright' and have 'blue' added, 'menthol' would become 'green' and 'capsule' would become 'crushball'." [Retail Newsagent, 28 October 2016]</p>                                                                                                                                                                                                                                                                                                                                                                                     |
| <p>3. Focusing on lower price segments</p>                               | <p>Introducing premium features into cheaper price segments</p> | <p>"Living in a post-EUTPD II world... [a retailer reported] "Customers have become more price-sensitive since legislation banned the sale of 10- packs and they are more concerned about how much they can get for their money these days" ...To help retailers tap into the trend for budget tobacco, JTI has relaunched Scottish brand Kensitas Club King Size and dropped its RRP " Yau A. The latest developments from the biggest tobacco brands. [Retail Newsagent, 5 April 2018]</p>                                                                                                                                                                                                                                                                                                                                                                                                      |
| <p>4. Promote products by innovating exemptions to the legislation</p>   | <p>4.1 Bevelled edges and resealable packs</p>                  | <p>"In order to re-engage disengaged cash-strapped smokers migrating to lower-priced brands and categories, manufacturers have been "adding value" to their brands through innovation, both on the pack and via the product itself... PMI concentrated on areas such as pack size (extra-large pack sizes), pack type (resealable), cigarette length (compact), microslims, filter type (with a focus on recessed filters) and flavour capsules (including the world's first recessed filter capsule and the world's first double capsule – menthol and peppermint). Pack innovation: Tactile finishes, including raised surfaces such as embossing and bevelled edges... (39)<sup>1</sup> [Euromonitor, July 2016]</p>                                                                                                                                                                           |
|                                                                          | <p>4.2 Menthol</p>                                              | <p>"JPS Green Edge will replace it and feature a menthol inner liner within the packaging, which the company claims will be "more effective at transferring flavour to the cigarettes than traditional menthol tips"". Imperial Tobacco [Talking Retail, 24 November 2017]</p>                                                                                                                                                                                                                                                                                                                                                                                                                                                                                                                                                                                                                    |

<sup>1</sup> This Euromonitor report was published two months into the sell-off period. We did find evidence of embossing and raised surfaces on packets prior to the full implementation of the legislation but these changes were lost when standardised packaging came into effect. During the sell-off, filter innovations, capsule innovations, bevelled edges and a pack resealing mechanism on one brand were observed – these changes were able to carry through when packs became standardised. In this study we did not observe extra length cigarettes, a greater volume of cigarettes or microslims.

|                                                                                                                                                     |                                                                                                         |                                                                                                                                                                                                                                                                                                                                                                                                                                                                                                                                                                                                                                                                                                                                                                                                                                                                                                                                                                                                                                                                                                                                                                                                                                                                                                                                                                                                                                           |
|-----------------------------------------------------------------------------------------------------------------------------------------------------|---------------------------------------------------------------------------------------------------------|-------------------------------------------------------------------------------------------------------------------------------------------------------------------------------------------------------------------------------------------------------------------------------------------------------------------------------------------------------------------------------------------------------------------------------------------------------------------------------------------------------------------------------------------------------------------------------------------------------------------------------------------------------------------------------------------------------------------------------------------------------------------------------------------------------------------------------------------------------------------------------------------------------------------------------------------------------------------------------------------------------------------------------------------------------------------------------------------------------------------------------------------------------------------------------------------------------------------------------------------------------------------------------------------------------------------------------------------------------------------------------------------------------------------------------------------|
| <p>1<br/>2<br/>3<br/>4<br/>5<br/>6<br/>7<br/>8<br/>9<br/>10<br/>11<br/>12<br/>13<br/>14<br/>15<br/>16<br/>17<br/>18<br/>19<br/>20<br/>21<br/>22</p> | <p>4.3 Filters (another way to create the perception that some products are healthier than others?)</p> | <p>Marlboro Touch, previously known as Marlboro Gold Touch, now has a soft touch pack and firm filter keeping the consistency with the rest of the Marlboro range. The firm filter allows adult smokers a cleaner way to stub out their cigarette, as well as adding an overall feeling of quality, without having an impact upon taste." [Talking Retail, 31 July 2015]</p> <p>"Launching ...as the European Union Tobacco Productive Directive comes into force, [Pall Mall's] redesign... will include the new Taste Plus Filter that aims to create a firmer in-hand feel and improve filtration" [The Grocer, 18 April 2016]</p> <p>"...JPS Triple Flow... "a revolution in cigarette technology." Triple Flow uses "unique" "easy draw" channels, with a new, "high quality smooth" tobacco blend enhanced by a mineral filter that provides "a fuller smoking experience". Each cigarette is also wrapped in a special paper, designed to actively reduce the amount of smoke emitted - which may result in less smell, says Imperial. Brand portfolio manager Emma Stew said: "Smooth blends now account for almost a quarter [ITUK estimates September 2015] of factory made cigarette (FMC) sales, and Triple Flow has been designed to offer the ultimate smooth smoking experience. 'With its next generation features and distinctive packaging, there is nothing like it in the market'" [Wholesale News November 2015]</p> |
| <p>23<br/>24<br/>25<br/>26<br/>27<br/>28</p>                                                                                                        | <p>4.4 RYO papers and filter tips</p>                                                                   | <p>Imperial Tobacco brand manager Jamie Burns-Smith said: "Natura taps into an increasing consumer desire for responsibly sourced products. Crafted from 100% hemp, Natura papers and tips are the perfect sustainable way to enjoy an authentic tobacco taste. Imperial Tobacco has also launched Rizla Menthol Tips, as the company claims "menthol tips are the fastest-growing segment of the tips market". [Talking Retail, 3 August 2017]</p>                                                                                                                                                                                                                                                                                                                                                                                                                                                                                                                                                                                                                                                                                                                                                                                                                                                                                                                                                                                       |
| <p>29<br/>30<br/>31<br/>32<br/>33<br/>34<br/>35<br/>36<br/>37<br/>38<br/>39<br/>40</p>                                                              | <p>4.5 Cigars</p>                                                                                       | <p>"Break, as they are cigarillos, are exempt. We can do packs of less than 20, and we can do flavours... Cigars won't be a standard colour pack, and will still have product name branding... you can sell individually and in 10 packs" Jens Christiansen, Scandinavian Tobacco Group's head of marketing &amp; public affairs [Retail Express, 6 June 2016]</p> <p>"Cigars benefit from the fact they can be sold in 10-packs, while also being exempt from certain branding restrictions. Scandinavian Tobacco Group (STG) is using this to its advantage and its marketing this year... the packaging stands out when compared to traditional cigarettes... and the investment made by companies such as STG to raise awareness and education in the convenience trade really helps... Ritmeester's says miniature cigars have traditionally been products that are better known among tobacco enthusiasts. As a result, it is offering samples of its Royal Dutch range to retailers to increase awareness...</p>                                                                                                                                                                                                                                                                                                                                                                                                                   |



1  
2  
3  
4  
5  
6  
7  
8  
9  
10  
11  
12  
13  
14  
15  
16  
17  
18  
19  
20  
21  
22  
23  
24  
25  
26  
27  
28  
29  
30  
31  
32  
33  
34  
35  
36  
37  
38  
39  
40  
41  
42  
43  
44  
45  
46

|  |                              |                                                                                                                                                                                                                                                                                                                                                                                                                                                                                                                                                                                                                                                                                                                                                                                                                                                                                                                                                                                                                                                                                                                                                                                                                                     |
|--|------------------------------|-------------------------------------------------------------------------------------------------------------------------------------------------------------------------------------------------------------------------------------------------------------------------------------------------------------------------------------------------------------------------------------------------------------------------------------------------------------------------------------------------------------------------------------------------------------------------------------------------------------------------------------------------------------------------------------------------------------------------------------------------------------------------------------------------------------------------------------------------------------------------------------------------------------------------------------------------------------------------------------------------------------------------------------------------------------------------------------------------------------------------------------------------------------------------------------------------------------------------------------|
|  |                              | <p>"I find the curry socials Ritmeester holds with retailers and the trade press very useful. It's a hands-on, but informal way of learning about the latest developments in the cigar market. There isn't as much awareness about cigars as cigarettes. These opportunities give us a chance to learn about how we can upsell to smokers who want value." [Retailer]" [<i>Retail Newsagent</i>, 5 April 2018]</p> <p>"If a smoker only has £5 on them, they cannot buy from your gantry, but if you present them with cigars they can." Ritmeester [<i>Retail Express</i>, 17 September 2017]</p> <p>"[Retailer] says he struggles with selling Mini Moods. [Ritmeester's] Lyles explains: "It might be because you're aiming them at cigar smokers, but it's primarily aimed at cigarette smokers. Because of the double filter, it makes for a smoother smoke." ... Cigars are now the cheapest product in a gantry. Lyles says: "If a smoker only has £5 on them, they cannot buy from your gantry, but if you present them with cigars they can." [<i>Retail Express</i>, 17 September 2017]</p> <p>"The margins we make on miniature cigars are 30% when sold at RRP' [Retailer]" [<i>Retail Newsagent</i>, 5 April 2018]</p> |
|  | 4.6 Pipe tobacco sold as RYO | <p>"The sell-through period for branded RYO and cigarettes ended last week, with products now sold in minimum formats and carrying larger health warnings as part of the new tobacco legislation. Yet, UK tobacco manufacturer Gawith Hoggarth is promoting its Kendal brand as a product which is cut to pipe tobacco regulations but can also be used as hand-rolling tobacco. "We've cut the tobacco to the thinnest width we are allowed to which means we can sell it in branded packaging and in 12.5g pouches," said the company's area sales manager Martin Bobbette. The company hopes retailers will recommend the product to smokers who ask for "whatever is cheapest"" [<i>Retail Newsagent</i>, 25 May 2017]</p>                                                                                                                                                                                                                                                                                                                                                                                                                                                                                                      |

Table S3 Compliance with standardised packaging over time<sup>1</sup>

|        | % standardised packs | change from previous month | total sticks sold          | non-compliant sticks sold             |
|--------|----------------------|----------------------------|----------------------------|---------------------------------------|
| Jul-16 | 0%                   |                            | 2,574,340,308              | 2,574,204,015                         |
| Aug-16 | 0%                   | 0%                         | 2,620,104,622              | 2,610,727,340                         |
| Sep-16 | 1%                   | 1%                         | 2,424,692,602              | 2,397,886,927                         |
| Oct-16 | 3%                   | 2%                         | 2,491,577,487              | 2,423,864,794                         |
| Nov-16 | 4%                   | 1%                         | 2,424,660,803              | 2,323,057,266                         |
| Dec-16 | 9%                   | 4%                         | 2,593,371,625              | 2,370,713,888                         |
| Jan-17 | 21%                  | 12%                        | 2,316,632,301              | 1,829,871,306                         |
| Feb-17 | 45%                  | 24%                        | 2,184,811,712              | 1,204,205,686                         |
| Mar-17 | 64%                  | 20%                        | 2,402,514,817              | 852,983,422                           |
| Apr-17 | 79%                  | 14%                        | 2,386,041,031              | 506,014,392                           |
| May-17 | 91%                  | 12%                        | 2,475,338,965              | 228,361,777                           |
| Jun-17 | 97%                  | 6%                         | 2,359,196,539              | 81,803,934                            |
| Jul-17 | 98%                  | 1%                         | 2,461,000,857              | 53,453,290                            |
| Aug-17 | 98%                  | 0%                         | 2,412,267,420              | 43,336,437                            |
| Sep-17 | 99%                  | 0%                         | 2,267,864,526              | 29,804,540                            |
| Oct-17 | 99%                  | 0%                         | 2,303,639,526              | 27,803,694                            |
| Nov-17 | 99%                  | 0%                         | 2,231,013,199              | 25,718,138                            |
|        |                      |                            | total thousands of kg sold | non-compliant* (thousands of kg sold) |
| RYO    |                      |                            |                            |                                       |
| Aug-16 | 1%                   |                            | 552287                     | 546963                                |
| Sep-16 | 1%                   | 0%                         | 521917                     | 516721                                |
| Oct-16 | 11%                  | 10%                        | 528560                     | 469493                                |
| Nov-16 | 18%                  | 7%                         | 518188                     | 424040                                |
| Dec-16 | 26%                  | 8%                         | 541359                     | 400109                                |
| Jan-17 | 44%                  | 18%                        | 516174                     | 288710                                |
| Feb-17 | 55%                  | 11%                        | 490464                     | 218940                                |
| Mar-17 | 75%                  | 20%                        | 539695                     | 132601                                |
| Apr-17 | 91%                  | 16%                        | 534343                     | 45509                                 |
| May-17 | 97%                  | 5%                         | 557734                     | 19294                                 |
| Jun-17 | 98%                  | 2%                         | 539118                     | 9037                                  |
| Jul-17 | 99%                  | 1%                         | 559731                     | 5908                                  |
| Aug-17 | 99%                  | 0%                         | 560994                     | 4609                                  |
| Sep-17 | 99%                  | 0%                         | 536870                     | 2984                                  |
| Oct-17 | 99%                  | 0%                         | 542052                     | 2802                                  |
| Nov-17 | 100%                 | 0%                         | 530219                     | 2511                                  |

\*RYO estimated to be sold in standardised packaging if sold in 30g or larger not pricemarked pack and (a) 30g pack of same variant on the market or (b) if 30g pack never available, pack on the market at end of analysis period)

Table S4 Menthol and capsule innovation

|                  | Present at start |       | New Variant |       |    | Total |
|------------------|------------------|-------|-------------|-------|----|-------|
|                  | N                | %     | N           | %     | N  | %     |
| <b>Menthol*</b>  |                  |       |             |       |    |       |
| FM premium       | 9                | 28%   | 2           | 20%   | 11 | 26.2  |
| FM midprice      | 8                | 25%   | 0           | 0%    | 8  | 19.0  |
| FM value         | 8                | 25%   | 4           | 40%   | 12 | 28.6  |
| FM subvalue      | 3                | 9%    | 3           | 30%   | 6  | 14.3  |
| no price segment | 4                | 13%   | 1           | 10%   | 5  | 11.9  |
|                  | 32               | 76.2% | 10          | 23.8% | 42 | 100.0 |
| <b>Capsule**</b> |                  |       |             |       |    |       |
| FM premium       | 2                | 15%   | 0           | 0%    | 2  | 10.5  |
| FM midprice      | 2                | 15%   | 0           | 0%    | 2  | 10.5  |
| FM value         | 9                | 69%   | 3           | 50%   | 12 | 63.2  |
| FM subvalue      | 0                | 0%    | 3           | 50%   | 3  | 15.8  |
| Total            | 13               | 68.4% | 6           | 31.6% | 19 | 100.0 |

\*Menthol: variant name includes 'menthol' or 'green'

\*\*Capsule: variant name includes 'capsule', 'crushball', 'dual', 'duo', 'demand', 'click on' or 'burst'

Table S5 Euromonitor estimates of the growth of cigars and cigariillos

|      | value constant £ mln | value current £ mln | volume million units |
|------|----------------------|---------------------|----------------------|
| 2015 | 291.8                | 289.9               | 390.4                |
| 2016 | 282.5                | 282.5               | 382.8                |
| 2017 | 324.5                | 332.6               | 451.6 estimate       |
| 2018 | 347.8                | 366.3               | 493.8 estimate       |

Source: © Euromonitor International
